1 **Biomass formation and sugar release efficiency of *Populus* modified by altered expression**  
2 **of a NAC transcription factor**

3 Raja S Payyavula<sup>1</sup>, Raghuram Badmi<sup>1</sup>, Sara S Jawdy<sup>1</sup>, Miguel Rodriguez Jr<sup>1</sup>, Lee Gunter<sup>1</sup>, Robert  
4 W Sykes<sup>2</sup>, Kimberly A. Winkeler<sup>3</sup>, Cassandra M. Collins<sup>3</sup>, William H. Rottmann<sup>3</sup>, Jin-Gui Chen<sup>1</sup>,  
5 Xiaohan Yang<sup>1</sup>, Gerald A Tuskan<sup>1</sup> and Udaya C Kalluri<sup>1\*</sup>

6 <sup>1</sup>BioEnergy Science Centre, Center for Bioenergy Innovation and Biosciences Division, Oak  
7 Ridge National Laboratory, Oak Ridge, TN 37831.

8 <sup>2</sup>The Biosciences Center, National Renewable Energy Laboratory, Golden, CO 80401.

9 <sup>3</sup>ArborGen Inc., Ridgeville, SC 29472

10 **\*Author for Correspondence:** Udaya C Kalluri (email: [kalluriudayc@ornl.gov](mailto:kalluriudayc@ornl.gov))

11

12 **Running title:** NAC gene regulates biomass composition and conversion

13

14 **Key words:** biomass, cellulose, cell wall, lignin, MYB, NAC transcription factor, SND,  
15 WND1B, sugar release

16

17 This manuscript has been authored by UT-Battelle, LLC under Contract No. DE-AC05-  
18 00OR22725 with the U.S. Department of Energy. The United States Government retains and the  
19 publisher, by accepting the article for publication, acknowledges that the United States  
20 Government retains a non-exclusive, paid-up, irrevocable, world-wide license to publish or  
21 reproduce the published form of this manuscript, or allow others to do so, for United States  
22 Government purposes. The Department of Energy will provide public access to these results of  
23 federally sponsored research in accordance with the DOE Public Access  
24 Plan(<http://energy.gov/downloads/doe-public-access-plan>).

25

26

## 27 **Abstract**

28 Woody biomass is an important feedstock for biofuel production. Manipulation of wood properties  
29 that enable efficient conversion of biomass to biofuel reduces cost of biofuel production. Wood  
30 cell wall composition is regulated at several levels that involve expression of transcription factors  
31 such as wood-/secondary cell wall- associated NAC domains (WND or SND). In *Arabidopsis*  
32 *thaliana*, *SND1* regulates cell wall composition through activation of its down-stream targets such  
33 as MYBs. The functional aspects of *SND1* homologs in the woody *Populus* have been studied  
34 through transgenic manipulation. In this study, we investigated the role of *PdWND1B*, *Populus*  
35 *SND1* sequence ortholog, in wood formation using transgenic manipulation through over-  
36 expression or silencing under the control of a vascular-specific 4-coumarate-CoA ligase (*4CL*)  
37 promoter. As compared to control plants, *PdWND1B*-RNAi plants were shorter in height, with  
38 significantly reduced stem diameter and dry biomass, whereas there were no significant differences  
39 in growth and productivity of *PdWND1B* over-expression plants. Conversely, *PdWND1B* over-  
40 expression lines showed a significant reduction in cellulose and increase in lignin content, whereas  
41 there was no significant impact on lignin content of down-regulated lines. Stem carbohydrate  
42 composition analysis revealed a decrease in glucose, mannose, arabinose, and galactose, but an  
43 increase in xylose in the over-expression lines. Transcriptome analysis revealed upregulation of  
44 several downstream transcription factors and secondary cell wall related structural genes in the  
45 *PdWND1B* over-expression lines that corresponded to significant phenotypic changes in cell wall  
46 chemistry observed in *PdWND1B* overexpression lines. Relative to the control, glucose release  
47 and ethanol production from stem biomass was significantly reduced in over-expression lines but  
48 appeared enhanced in the RNAi lines. Our results show that *PdWND1B* is an important factor  
49 determining biomass productivity, cell wall chemistry and its conversion to biofuels in *Populus*.

50

## 51 **Introduction**

52 Woody biomass, harvested as feedstock for the pulp and paper, bioproduct and biofuel industries,  
53 is formed by tightly regulated biological and molecular genetic xylogenesis mechanisms. Primary  
54 xylem is formed from procambium while secondary xylem is formed from vascular cambium  
55 during secondary growth. The major constituents of secondary cell walls are cellulose, lignin, and  
56 hemicellulose (Darvill *et al.*, 1980). Cellulose is the most abundant polymer in plants and is a

57 polymer of glucose synthesized on the plasma membrane by the cellulose synthase (CesA)  
58 complex (Doblin *et al.*, 2002). Lignin is the second most abundant polymer and is composed of  
59 guaiacyl (G), syringyl (S), and p-hydroxyphenyl (H) units derived through the phenylpropanoid  
60 pathway (Boerjan *et al.*, 2003). In addition to cell division and expansion that occurs in primary  
61 cells, secondary xylem formation includes secondary wall deposition, lignification, and  
62 programmed cell death (Plomion *et al.*, 2001). The formation of xylem cell walls is coordinately  
63 regulated at multiple layers by dozens of structural genes and transcription factors.

64

65 The major transcription factors that regulate secondary cell wall synthesis include SHINE (SHN),  
66 NAC (which stands for *NAM*, *ATAF1/2* and *CUC2*) domain transcription factors, and MYBs  
67 (Yamaguchi and Demura, 2010; Zhong *et al.*, 2006). SHN is the master switch that controls the  
68 expression of down-stream transcription factors, NAC and MYBs (Ambavaram *et al.*, 2011).  
69 Over-expression of *AtSHN* in rice (*Oryza sativa*) increased cellulose and decreased lignin  
70 (Ambavaram *et al.*, 2011). The master and downstream transcription factors in the secondary cell  
71 wall transcription factor hierarchy include wood or secondary wall associated NAC domains  
72 (*WND/SND*), NAC secondary wall thickening promoting factor (NST), and vascular-related NAC  
73 domain (VND) transcription factors (Yamaguchi and Demura, 2010; Lin *et al.* 2017). The protein  
74 structure of NAC domain members is highly conserved in the N-terminal region and is required  
75 for nuclear localization and homo- or hetero-dimerization (Olsen *et al.*, 2005). The C-terminal  
76 region has two conserved motifs, the LP-box and the WQ-box that regulate transcriptional  
77 activation (Ko *et al.*, 2007; Yamaguchi *et al.*, 2008). There is evidence for role of NAC family  
78 members in multiple plant processes and these functional roles can be redundant among sequence  
79 homologs (Aida *et al.*, 1997; He *et al.*, 2005; Hibara *et al.*, 2003).

80

81 The NAC domain transcription factor is one of the largest families, with ~ 100 genes in  
82 *Arabidopsis* and soybean (*Glycine max*) and ~ 140 genes in rice (*Oryza sativa*) (Ooka *et al.*, 2003;  
83 Pinheiro *et al.*, 2009). In *Populus*, there are 163 genes clustered in 18 subfamilies (Hu *et al.*, 2010).  
84 Among these, a few candidate transcription factors have been functionally characterized in model  
85 species such as *Arabidopsis* and rice. In *Arabidopsis*, at least three NAC domain members, *NST1*,  
86 *NST2*, and *NST3/SND1*, have been shown to have functional roles in regulating secondary cell wall  
87 biosynthesis (Mitsuda *et al.*, 2007; Mitsuda and Ohme-Takagi, 2008; Zhong *et al.*, 2006). T-DNA

88 knockout mutants of *AtSND1* showed no difference from wildtype suggesting that the other  
89 isoforms might have compensated for the loss (Zhong *et al.*, 2006). In contrast, either over-  
90 expression or dominant repression of *AtSND1* results in plants with weak stems and drastically  
91 reduced interfascicular fiber and xylary fiber wall thickness (Zhong *et al.*, 2006). Over-expression  
92 of *AtSND1* resulted in massive deposition of lignified secondary cell walls suggesting that normal  
93 levels of *AtSND1* transcripts are necessary for maintaining proper cell wall thickening in secondary  
94 stems (Zhong *et al.*, 2006). The defective secondary cell wall formation phenotype observed in  
95 *Arabidopsis snd1nst2* double mutants was restored by complementation with WNDs from  
96 *Populus*, suggesting that *Populus* WNDs regulate secondary wall biosynthesis (Mitsuda *et al.*,  
97 2007; Zhong *et al.*, 2010; Zhong *et al.*, 2007a). The NAC transcription factors bind to SNBE  
98 (secondary wall NAC binding elements) in the promoters of its downstream targets and regulate  
99 their expression. *PtWND2B* induces expression of several wood associated MYB transcription  
100 factors and genes involved in secondary cell wall biosynthesis (Zhong *et al.*, 2011; Mc Carthy *et*  
101 *al.* 2011). Over-expression of another NAC transcription factor gene, *Pt-SND1-B1*, in *Populus*  
102 stem-differentiating xylem (SDX) protoplasts was reported to induce 178 differentially expressed  
103 genes (DEGs) of which 76 were identified to be its direct targets (Lin *et al.*, 2013). Furthermore,  
104 two splice variants from NAC and VND transcription factor families are involved in reciprocal  
105 cross-regulation during wood formation (Lin *et al.*, 2017). However, much less is known about the  
106 role of these transcription factors in maintaining cell wall composition. Recently, over-expression  
107 of a NAC family member, *PdWND3A*, was reported to affect lignin biosynthesis, decrease the rate  
108 of sugar release and reduce biomass (Yang *et al.*, 2019). Given there is redundancy reported among  
109 functional roles of some NAC transcription factor family members and the knowledge of upstream  
110 master regulators of secondary wall biosynthesis, *AtSND1*, in *Arabidopsis*, here we sought to  
111 characterize the role of sequence ortholog, *PdWND1B*, in *Populus deltoides* in the context of  
112 biomass formation. To advance our knowledge on the role of additional NAC/WND transcription  
113 members in secondary cell wall biosynthesis, we developed transgenic *Populus deltoides* plants  
114 with xylem-specific over-expression or RNAi mediated silencing of *PdWND1B*,  
115 Potri.001G448400; *WND1B* has previously been referred to as PNAC017, VNS11, SND1-A2  
116 (Ohtani *et al.* 2011; Zhong *et al.* 2010; Li *et al.* 2012; Hu *et al.* 2010; Takata *et al.* 2019). RNAi  
117 transgenic plants displayed weaker stems and altered cell wall composition as compared to control  
118 plants. Over-expression lines showed increased lignin content and significantly reduced ethanol

119 production from stem biomass as compared to control plants. Our results confirm that *WND1B*  
120 plays an important role in secondary cell wall biosynthesis.

121

## 122 **Methods**

### 123 **Phylogenetic analysis**

124 Protein sequences of *Populus* WND isoforms were retrieved from *Phytozome v9.1: Populus*  
125 *trichocarpa v3.0* (Tuskan *et al.*, 2006) and those corresponding to other plant species were  
126 obtained from NCBI. Phylogenetic analysis was performed in MEGA (Molecular Evolutionary  
127 Genetics Analysis) using the Neighbor-Joining method (Tamura *et al.*, 2011). Bootstrap values  
128 were calculated from 500 independent bootstrap runs. Protein sequence alignment was performed  
129 using ClustalW and shading and percent similarity were predicted by GeneDoc (Nicholas *et al.*,  
130 1997).

131

### 132 **GFP localization**

133 The full length coding regions of *PdWND1A* (Potri.011G153300) and *PdWND1B*  
134 (Potri.001G448400) were amplified from a *P. deltoides* xylem cDNA library (primers listed in  
135 Supplemental file 1) using Q5 High-Fidelity DNA polymerase (New England Biolabs, Ipswich,  
136 MA) and cloned in a pENTR vector (Invitrogen, Carlsbad, CA, USA). After sequence  
137 confirmation, the coding region fragment was recombined into a Gateway binary vector pGWB405  
138 (Tsuyoshi *et al.*, 2009) using LR clonase (Invitrogen). Plasmid from a positive clone was  
139 transformed to *Agrobacterium tumefaciens* strain GV3101. Tobacco infiltration and protein  
140 localization were performed as described previously (DePaoli *et al.*, 2011; Sparkes *et al.*, 2006).  
141 *Agrobacterium* harboring the binary constructs *PdWND1A* or *PdWND1B* were cultured overnight  
142 in LB media. After brief centrifugation, supernatant was removed and the pellet was dissolved in  
143 10 mM MgCl<sub>2</sub>. The culture was infiltrated into four-week-old tobacco leaves. After 48 h, roughly  
144 4 mm<sup>2</sup> leaf sections were cut and fixed in 3.7% formaldehyde, 50 mM NaH<sub>2</sub>PO<sub>4</sub>, and 0.2% Triton  
145 X-100 for 30 min, rinsed with phosphate-buffered saline (PBS), and stained in DAPI (4,6'-  
146 diamidino-2-phenylindole, 1.5 µg ml<sup>-1</sup> in PBS) for 30 min. GFP visualization and imaging was  
147 performed on a Zeiss LSM710 confocal laser scanning microscope (Carl Zeiss Microscopy,  
148 Thornwood, NY) equipped with a Plan-Apochromat 63x/1.40 oil immersion objective.

149

## 150 **Plant materials**

151 The over-expression construct was developed by amplifying and ligating the 1235 bp coding  
152 region fragment of *PdWND1B* (gene model: Potri.001G448400, primers presented in  
153 Supplemental file) under the control of a vasculature specific *4-coumarate CoA-ligase (4CL)*  
154 promoter. The RNAi construct for the same gene was developed by amplifying a 300 bp coding  
155 region fragment (from 800 to 1100 bp) and ligated in sense and antisense orientation to form a  
156 hairpin with the chalcone synthase intron, under the control of *4CL* promoter. The binary  
157 constructs were transformed into wild-type *P. deltoides* ‘WV94’ using an *Agrobacterium* method  
158 (Caiping *et al.*, 2004). Transgenic plants and empty vector transformed control plants that were  
159 roughly 10 cm tall were moved from tissue culture to small tubes with soil. After 2-months, plants  
160 were moved to bigger pots (6 liter) and were propagated in a greenhouse maintained at 25°C with  
161 a 16 h day length. At the time of harvest (six-month-old plants), plant height was measured from  
162 shoot tip to stem base, and diameter was measured two inches from the base of the stem. The  
163 bottom 10 cm stem portion was harvested, air-dried, and used for carbohydrate composition,  
164 cellulose, lignin, S:G ratio, and sugar and ethanol release analysis. Initial studies were performed  
165 on 10 transgenic lines for each construct and additional studies were performed on two to four  
166 selected lines. Data presented here is from two representative lines. Young leaf (leaf plastochron  
167 index, LPI-0 and 1), mature leaf (LPI-6<sup>+</sup>), and stem (internode portion between LPI 6 and 8) were  
168 collected, frozen in liquid nitrogen, and stored at -80°C until they were processed further.

169

## 170 **RNA extraction and gene expression studies**

171 RNA from frozen ground stem samples was extracted using a Plant Total RNA extraction kit  
172 (Sigma, St Louis, MO) with modifications to the kit protocol. Briefly, 100 mg of frozen ground  
173 tissue was incubated at 65°C in 850 µl of a 2% CTAB + 1% βme buffer for 5 min, followed by the  
174 addition of 600 µl of chloroform:isoamylalcohol (24:1 v/v). The mixture was spun at full speed in  
175 a centrifuge for 8 min after which the supernatant in the top layer was carefully removed and  
176 passed through a filtration column included in the kit. The filtered elutant was diluted with 500 µl  
177 of 100% EtOH and passed through a binding column. This was repeated until all of the filtered  
178 elutant/EtOH mixture was passed through the binding column. Further steps including on-column  
179 DNase digestion (DNase70, Sigma), filter washes, and total RNA elution were followed as per the  
180 manufacturer’s protocol. cDNA was synthesized from 1.5 µg total RNA using oilgodT primers

181 and RevertAid Reverse Transcriptase (Thermofisher). Quantitative reverse transcriptase PCR  
182 (qRT-PCR) was performed in a 384-well plate using cDNA (3 ng), gene specific primers (250 nM,  
183 list provided in Supplemental file), and iTaq Universal SYBR Green Supermix (1X, Bio Rad).  
184 Relative gene expression was calculated using the delta CT or delta-delta CT method (Livak and  
185 Schmittgen, 2001). Template normalization was done using two housekeeping genes, 18S  
186 ribosomal RNA and Ubiquitin-conjugating enzyme *E2*. Gene accession numbers and primer  
187 sequence information are presented in Supplemental file 1.

188

### 189 **Micro Chromatin Immunoprecipitation ( $\mu$ ChIP) assay from protoplasts:**

190 Transcription factor PdWND1B was cloned in-frame with 10X Myc tag and used to transfect  
191 protoplasts derived from *Populus* 717-1B4 tissue culture grown plants (Guo et al, 2012). ChIP  
192 assays were performed using the modified protocol from Dahl and Collas (2008) and Adli and  
193 Bernstein (2011). Briefly, transfected protoplasts were resuspended in W5 solution (154mM NaCl,  
194 125 mM CaCl<sub>2</sub>, 5 mM KCl, 2 mM MES (pH 5.7)), crosslinked by adding 1% (v/v) formaldehyde  
195 and gently rotating the tubes for 8 min. To stop crosslinking, Glycine was added to a final  
196 concentration of 0.125 M and gently rotated at room temperature for 5 min. The crosslinked  
197 protoplasts were washed once with W5 solution and lysed by mixing with SDS Lysis Buffer (50  
198 mM Tris-HCl (pH 8.0), 100 mM NaCl, 10 mM EDTA (pH 8.0), 1% SDS, 1 mM PMSF, protease  
199 inhibitor) followed by incubation on ice for 10 min with intermittent and brief vortexing. The  
200 lysate was supplemented with RIPA ChIP Buffer (10mM Tris-HCl (pH 7.5), 140 mM NaCl, 1 mM  
201 EDTA (pH 8.0), 1% Triton X-100, 0.1% Na-deoxycholate, 1 mM PMSF, protease inhibitor) and  
202 sonicated for 150 s with 0.7 s ‘On’ and 1.3 s ‘Off’ pulses at 20% power amplitude on ice using  
203 Branson 450 Digital sonifier to generate 150- to 600-bp chromatin fragments. Additional ice-cold  
204 RIPA ChIP buffer was added to aliquot the sample into three separate tubes – 500  $\mu$ l Antibody  
205 (Ab) sample, 500  $\mu$ l No-Antibody (NAb) sample and 75 $\mu$ l input chromatin. To the Ab sample,  
206 0.75-1  $\mu$ g anti-c-Myc antibody (Sigma-Aldrich #C3956) was added and gently rotated overnight  
207 at 4°C. Protein A Mag Sepharose (Sigma-Aldrich #28-9440-06) beads were washed with RIPA  
208 buffer (10 mM Tris-HCl (pH 7.5), 140 mM NaCl, 1 mM EDTA (pH 8.0), 1% Triton X-100, 0.1%  
209 SDS, 0.1% Na-deoxycholate), added to Ab and NAb samples and gently rotated at 4°C for 120  
210 min. The beads were then collected, washed twice with low-salt wash buffer (150 mM NaCl, 0.1%  
211 SDS, 20 mM Tris-HCl (pH 8.0), 2 mM EDTA (pH 8.0), 1% Triton X-100), twice with LiCl buffer

212 (0.25 M LiCl, 1% Na-deoxycholate, 10 mM Tris-HCl (pH 8.0), 1% NP-40, 1 mM EDTA (pH 8.0))  
213 and twice with TE Buffer (10 mM Tris-HCl (pH 8.0), 1 mM EDTA (pH 8.0)). The beads were  
214 subjected to reverse crosslinking by adding Complete Elution Buffer (20 mM Tris-HCl (pH 8.0),  
215 5 mM EDTA (pH 8.0), 50 mM NaCl, 1% SDS, 50 µg/ml Proteinase K) and incubating for 120  
216 min on thermomixer at 68°C and 1300 rpm to elute protein-DNA complexes. Input samples were  
217 added with elution buffer (20 mM Tris-HCl (pH 8.0), 5 mM EDTA (pH 8.0), 50 mM NaCl) and  
218 50 µg/ml Proteinase K before placing on thermomixer. After incubation, supernatants were  
219 collected and the ChIP DNA was purified using MinElute PCR Purification Kit (Qiagen #28004).  
220 Real-time PCR was performed for the ChIPed DNA by promoter specific primers (Supplemental  
221 File 1) and the obtained Ct values were used to calculate the signal intensity by Percent Input  
222 Method. At least three biological replicates (with two technical replicates each) representing  
223 independent protoplast transfections were used. The ChIPed DNA was also used for PCR reactions  
224 by promoter specific primers to analyze the products on agarose gel.

225

### 226 **Transcriptional activator assay**

227 The coding sequence (CDS) of *WND1B* was in-frame cloned in a Gal4 binding domain (GD)  
228 effector vector (Wang et al, 2007). For the trans-activator assays, the GD-fusion constructs were  
229 co-transfected with Gal4:GUS reporter construct into *Populus* 717-1B4 protoplasts (Guo et al,  
230 2012). For the trans-repressor assays, GD-fusion constructs were co-transfected with LexA  
231 binding-domain fused VP16 (LD-VP) and LexA:Gal4:GUS reporter (Wang et al, 2007). An empty  
232 GD effector vector was co-transfected with reporter vectors for the control experiments. The  
233 transfected protoplasts were incubated in dark for 16-20 h and GUS activity was quantitatively  
234 measured. All the protoplast transfections were included with equal amounts of 35S:Luciferase  
235 reporter and Luciferase activity was used for normalization of GUS activity.

236

### 237 **Cellulose and lignin estimation**

238 Cellulose was estimated on debarked, ground, and air-dried stem tissue using the anthrone method  
239 (Updegraff, 1969). Stem sample (25 mg) was first digested with 500 µl of acetic - nitric acid  
240 reagent (100 ml of 80% acetic acid mixed with 10 ml of nitric acid) at 98°C for 30 min. After  
241 cooling, the sample was centrifuged, the supernatant was discarded, and the remainder was washed  
242 with water. After brief centrifugation, water was discarded, and the pellet was digested with 67%



243 (v/v) sulfuric acid for 1 h at room temperature. An aliquot of the mix was diluted (1:10) with water.  
244 In a PCR tube, 10  $\mu$ l of diluted reaction mix, 40  $\mu$ l of water, and 100  $\mu$ l of freshly prepared anthrone  
245 reagent (0.5 mg anthrone ml<sup>-1</sup> of cold concentrated sulfuric acid) was added and heated for 10 min  
246 at 96°C. Samples were cooled and absorbance ( $A_{630}$ ) was measured. Cellulose was then estimated  
247 based on the absorbance of glucose standards. Lignin and its monomer composition was analyzed  
248 using pyrolysis molecular beam mass spectrometry at the National Renewable Energy Laboratory  
249 as described previously (Mielenz *et al.*, 2009).

250

### 251 **Stem carbohydrate composition analysis**

252 Roughly 25 mg of air-dried stem sample was weighed in a 2-ml tube and extracted twice at 85°C  
253 with a total of 2 ml of 80% ethanol. The supernatant was collected in a new 2-ml tube and was re-  
254 extracted with 50 mg activated charcoal (Sigma) to eliminate pigments that interfere with sugar  
255 analysis. A 1 ml aliquot of the pigment free extract was incubated overnight in a heating block  
256 maintained at 50°C and the resulting pellet was dissolved in 120  $\mu$ l of water. A 10  $\mu$ l aliquot was  
257 used for estimation of sucrose and glucose using assay kits (Sigma). Starch from the pellet was  
258 digested using 1U of  $\alpha$ -amylase (from *Aspergillus oryzae*, Sigma) and amyloglucosidase (from  
259 *Aspergillus niger*, Sigma). After starch removal, the pellet was dried overnight at 95°C and used  
260 for estimating structural sugars. Roughly, 5 mg of sample was weighed in a 2-ml tube and digested  
261 with 50  $\mu$ l of 75% v/v H<sub>2</sub>SO<sub>4</sub> for 60 min. The reaction was diluted by adding 1.4ml of water, tubes  
262 were sealed using lid-locks, and autoclaved for 60 min in a liquid cycle. After cooling, the sample  
263 was neutralized with CaCO<sub>3</sub> and sugar composition was estimated using high performance liquid  
264 chromatography (HPLC, LaChrom Elite® system, Hitachi High Technologies America, Inc.) as  
265 described previously (Fu *et al.*, 2011; Yee *et al.*, 2012).

266

### 267 **Glucose release and ethanol conversion**

268 Separate hydrolysis and fermentation (SHF) was used to evaluate digestibility of biomass samples  
269 as described previously (Fu *et al.*, 2011; Yee *et al.*, 2012). Extract free biomass was autoclaved  
270 for sterilization purposes and the hydrolysis and fermentations were performed in biological  
271 triplicate at 5.0% (w/v) biomass loading in a total volume of 20 ml at a pH of 4.8 with a final  
272 concentration of 50 mM citrate buffer and 0.063 mg ml<sup>-1</sup> streptomycin. The hydrolysis was  
273 performed using commercial hydrolytic enzyme blends (Novozymes, Wilmington, DE, USA).

274 Cellic®-Ctec2 was loaded at 20 mg protein gram<sup>-1</sup> dry biomass, and Novozyme 188 and Cellic®  
275 Htec2 were loaded at 25% and 20% (v/v) of Ctec2, respectively. The biomass and enzymes were  
276 incubated at 50°C and 120rpm for 5 days. The hydrolysate was then fermented with  
277 *Saccharomyces cerevisiae* D5A (ATCC 200062) at 35°C and 150 rpm with a final concentration  
278 of 0.5% (w/v) yeast extract. Hydrolysate and fermentation broth samples were analyzed for  
279 glucose and ethanol using HPLC equipped with a refractive index detector (model L-2490). The  
280 products were separated on an Aminex® HPX-87H column (Bio-Rad Laboratories, Inc.) at a flow  
281 rate of 0.5 ml min<sup>-1</sup> of 5.0 mM sulfuric acid and a column temperature of 60°C and were quantified  
282 as described previously (Fu *et al.*, 2011; Yee *et al.*, 2012).

283

## 284 **Results and Discussion**

### 285 **Phylogenetic analysis, gene expression, and localization**

286 In *Arabidopsis*, at least three NAC transcription factors, *SND1*, *NST1*, and *VND7* have a proposed  
287 role in regulation of secondary cell wall formation. To retrieve their sequence orthologs from  
288 *Populus trichocarpa*, protein sequences of the three genes were blasted in *Phytozome* (v 9.1) and  
289 the two best hits were retrieved for each sequence resulting in a total of six sequences. These were  
290 designated as *PtrWND1A* (Potri.011G153300), *PtrWND1B* (Potri.001G448400), *PtrWND2A*  
291 (Potri.014G104800), *WND2B* (Potri.002G178700), *PtrWND6A* (Potri.013G113100) and  
292 *PtrWND6B* (Potri.019G083600). The nomenclature used in this study was based on Zhong *et al.*,  
293 (2010). All six genes have alternate names; *WND1B* has also been named *SND1A2* or *VNS11* in  
294 previously reports (Li *et al.*, 2012; Ohtani *et al.*, 2011). In the phylogenetic tree developed using  
295 protein sequences, *PtrWND1A* and *PtrWND1B* were clustered together and share 94% similarity  
296 at the protein level (Figure 1; Supplemental file 2), suggesting they originated from a recent  
297 genome duplication (Tuskan *et al.*, 2006). They share only approximately 50% similarity with  
298 *AtSND1* and *AtNST1*, approximately 56% with *PtrWND2A* and *PtrWND2B*, and approximately  
299 41% with *PtrWND6A* and *PtrWND6B*, but more than 83% with *RcNAC* (*Ricinus communis*) and  
300 *JcNAC013* (*Jatropha curcas*). *PtrWND2A* and *PtrWND2B* are clustered together and share 88%  
301 similarity, while *PtrWND6A* and *PtrWND6B* share 92% similarity. Protein sequence alignment  
302 revealed they are highly conserved in the NAC domain located in the N terminal region.  
303 Conversely, they are highly diverse in the C terminal region, which has putative activation domains  
304 (Olsen *et al.*, 2005; Xie *et al.*, 2000). At least 163 NAC domain transcription factors have been

305 reported in *Populus*. Based on phylogenetic analysis, these are classified into 18 groups (Hu *et al.*,  
306 2010). *PtrWND1A* and *B* and *PtrWND2A* and *B* are closely clustered in the NAC-B subgroup,  
307 while *PtrWND6A* and *B* are clustered in the NAC-O subgroup.

308

309 The expression of the above six NAC transcription factors was studied in eight different tissues of  
310 *Populus deltoides* including YL (young leaf), ML (mature leaf), YS (young stem), MS (mature  
311 stem), PH (phloem), XY (xylem), RT (root), and PT (petiole). In *Populus*, *WND1B* undergoes  
312 alternate splicing, resulting in two variants designated as the small and large variants. The large  
313 variant retains intron 2 (Li *et al.*, 2012; Zhao *et al.*, 2014). In this study, to account for both splice  
314 variants, primers were designed in the region common to both variants. In general expression of  
315 all the genes was much higher in xylem than in other tissues (Supplemental file 3). Within xylem,  
316 expression of *PdWND1A* and *PdWND1B* was much higher relative to the other genes. Among  
317 other tissues, expression of *PdWND1A* was much higher relative to the other genes except in  
318 phloem, where *PdWIN2B* was strongly expressed. Expression of *PdWIN6A* and *PdWIN6B* was  
319 weaker in all tissues relative to the other genes. In *Populus*, these transcription factors are most  
320 abundantly expressed in stems. *In situ* localization studies suggested both *PtrWND1B* and  
321 *PtWND6A* are expressed in xylem vessels and fibers and in phloem fibers after secondary growth,  
322 whereas in primary xylem vessels only *PtrWND6A* expression was observed, suggesting  
323 developmental regulation (Ohtani *et al.*, 2011). The two abundantly expressed genes, *PdWND1A*  
324 and *PdWND1B*, were selected for localization studies using tobacco infiltration. GFP:*PdWND1A*  
325 and GFP:*WND1B* were colocalized with DAPI stain confirming both *PdWND1A* and *PdWND1B*  
326 are targeted to the nucleus (Supplemental file 4). *AtSND1* and *PtWND1B* have previously been  
327 localized to the nucleus supporting their function as transcription factors (Li *et al.*, 2012; Zhong *et*  
328 *al.*, 2006).

329

### 330 **Plant morphology and growth**

331 In the present study, we focused on studying the functional aspects of *PdWND1B* through over-  
332 expression and RNAi-mediated suppression using a xylem specific *4CL* promoter. In order to  
333 selectively down-regulate *PdWND1B*, sequence in the 3' region that has distinct differences with  
334 *PdWND1A* was selected for RNAi construct development. In our preliminary study, six  
335 independent over-expression (OE) and six independent RNAi lines were propagated in the

336 greenhouse. Plant height of over-expression lines was not different as compared to controls, but  
337 RNAi lines were shorter (Supplemental file 5A). Lignin content was significantly higher in all  
338 over-expression lines but showed a slight decreasing trend in RNAi lines (Supplemental file 5B).  
339 In-depth characterization was performed on two to four selected lines and data presented in this  
340 study is representative of two over-expression lines (designated as OE2 to OE4) and two RNAi  
341 suppression lines (Ri1 and Ri4). The extent of alteration in *PdWND1B* expression in transgenic  
342 lines was measured using qRT-PCR. As compared to control lines, *PdWND1B* expression was  
343 increased by 40-fold in OE4 and by 23-fold in OE2 (Figure 2). In RNAi lines, *PdWND1B*  
344 expression was reduced by 73% in Ri4 and by 65% in Ri1.

345  
346 At the time of harvest (~six months of growth), control plants reached an average of 130 cm  
347 (Figure 3A). The OE plants were similar in height with that of controls. However, Ri lines were  
348 significantly shorter by 40 to 50% and reached an average of 66 to 78 cm (Figure 3A). A similar  
349 trend was also observed in stem diameter. As compared to controls, stem diameter in OE  
350 expression lines was not significantly altered but was reduced by 40% in Ri1 and Ri4 (Figure 3B).  
351 The combined effect of reduced plant height and stem diameter resulted in a roughly 75%  
352 reduction in total stem dry weight in Ri1 and Ri4 lines (Figure 3C). RNAi lines also developed  
353 smaller leaves and thus had a roughly 70% reduction in leaf weight (Figure 3D).

354  
355 Evidence suggests that *SND/WND* are required for normal plant development (Zhao *et al.*, 2014;  
356 Zhong *et al.*, 2010). Over-expression of the full-length coding region of *AtSND1* in *Arabidopsis*  
357 and *PtWIN2B* or *PtWIN6B* in *Populus tremula x alba*, under the control of a CaMV 35S promoter,  
358 resulted in plants with weaker stems, small leaves, and stunted growth. This strongly supports the  
359 hypothesis that the WNDs play a significant role in maintenance of growth and development  
360 (Zhong *et al.*, 2006; Zhong *et al.*, 2011). In contrast, over-expression of the *PtWND1B* whole gene  
361 (including exons and introns) in *Populus x euramericana*, under the control of a CaMV 35S  
362 promoter, did not affect plant growth, but only reduced leaf size (Zhao *et al.*, 2014). Our study  
363 included overexpression of the shorter variant of *PdWND1B* under the control of a xylem-specific  
364 promoter and the observation of no apparent growth impact in overexpression lines. Previous study  
365 reported that over-expression of the *PtWND1B* longer splice variant in *Populus x euramericana*,  
366 under the control of its own promoter, affected plant development, but the same effect was not

367 observed when the small variant of *PtWND1B* was over-expressed (Zhao *et al.*, 2014). Zhong *et*  
368 *al.*, (2006) also report that an *Atsnd1* mutation did not affect plant development. However,  
369 consistent with our study in *Populus*, down-regulation of *PtWND1B*, controlled by its own  
370 promoter, resulted in plants with weak stems that did not grow straight (Zhao *et al.*, 2014).  
371 Therefore, it appeared that *WND* genes may have species-specific effect on plant growth and  
372 development. It is also possible that the differences in promoters used (i.e., native promoter (Zhao  
373 *et al.*, 2014) and tissue-specific promoter (in the present study) may contribute to differences in  
374 phenotypic observations between *Arabidopsis* and *Populus*.

375

### 376 **Structural polymers**

377 *WND* transcription factors have a proposed function in secondary cell wall biosynthesis.  
378 Therefore, the effect of altered *PdWND1B* expression on secondary cell wall composition were  
379 studied in stems. Stem secondary cell walls are composed predominantly of cellulose, lignin, and  
380 hemicellulose (Bailey, 1938; Darvill *et al.*, 1980). Cellulose, estimated by the anthrone method,  
381 was significantly reduced by 9 to 13% in OE lines, but was increased by 6% in RNAi lines (Figure  
382 4A). Lignin content was significantly increased in OE lines but decreased in RNAi4 (Figure 4B).  
383 To understand changes in other sugars, stem cell walls were digested and sugars were quantified  
384 using HPLC. Glucose and xylose were the predominant sugars in control plant stem material, at  
385 45% and 15%, respectively (Figure 5). However, while glucose was reduced in OE lines, xylose,  
386 representing the hemicellulose fraction, was significantly increased (Figure 5). Levels of minor  
387 sugars including galactose, arabinose, and mannose were also significantly reduced in OE lines.  
388 Trace compounds, 5-(Hydroxymethyl) furfural was reduced (up to four fold) in RNAi lines, while  
389 2-furfural was significantly reduced by 60 to 75% in RNAi lines.

390

391 Over-expression of *AtSND1* induced ectopic deposition of lignified secondary cell walls in leaf  
392 and stem epidermal and mesophyll cells that normally do not undergo lignification (Zhong *et al.*,  
393 2006). In addition, cellulose and hemicellulose were also deposited. A similar response was  
394 observed in *Populus*, where *PtWND2B* and *PtWND6B* were over-expressed under the control of a  
395 CaMV 35S promoter (Zhong *et al.*, 2011). To address the biomass chemistry context of the present  
396 study, over-expression of *PdWND1B* in our study was driven by a xylem-specific promoter to  
397 avoid confounding growth effects arising from ectopic lignification. In the context of stem cell

398 wall phenotype, our results indicate an increase in lignin and xylose in stems of OE lines while  
399 cellulose levels were reduced. A negative relationship has been proposed between levels of  
400 cellulose and lignin (Hu *et al.*, 1999). We observed an increase in lignin and a concomitant  
401 decrease in cellulose of overexpression lines relative to the control. In *Arabidopsis*, silencing of  
402 *AtSND1* and *AtNST1* simultaneously reduced lignin, cellulose, and hemicellulose (Zhong *et al.*,  
403 2007a). In the present study, significant differences were not observed in levels of lignin or other  
404 sugars in RNAi lines, suggesting that the reduction in expression and function of *PdWND1B*  
405 potentially is partly compensated by other members of the NAC family (i.e., *PdWND1A*)  
406 members. In future studies, it would be interesting to generate and characterize double  
407 knockout/knockdown plants of *PdWND1A* and *PdWND1B*, and similarly, for other closely related  
408 paralogs, which can address the potential functional redundancy and reveal their more precise  
409 functions in secondary cell wall biosynthesis.

410

#### 411 **Sugar release and ethanol conversion**

412 The effect of altered cell wall composition on sugar release and ethanol conversion was studied in  
413 OE and RNAi lines. Glucose release was significantly reduced by 65 to 70% in OE plants  
414 compared to that of control plants (Figure 6A). This is consistent with a significant reduction in  
415 ethanol production from biomass. In contrast, glucose release was increased by 15% and 20% in  
416 RNAi1 and RNAi4 lines, respectively; however, ethanol production was increased (30%) only in  
417 RNAi4, the lines with greater downregulation (Figure 6B).

418

419 Biomass recalcitrance is determined by many parameters, but predominantly by cellulose and  
420 lignin content and composition. Lignin content and S:G ratio have been reported to influence sugar  
421 release efficiency in poplar (Studer *et al.*, 2011). An increase in lignin content and decrease in  
422 cellulose content had a strong negative impact on sugar release efficiency and ethanol conversion  
423 in OE lines in this study.

424

#### 425 **Gene expression changes**

426 In *Arabidopsis* and *Populus*, over-expression of *AtSND1* and *PtrWND2B* induced expression of a  
427 cascade of other transcription factors and structural genes involved in lignin, cellulose, and  
428 hemicellulose formation (Zhong *et al.*, 2006; Zhong *et al.*, 2011). A set of 26 *Populus* transcription

429 factors homologous to *Arabidopsis* secondary cell wall associated transcription factors induced by  
430 *AtSND1* over-expression were studied here. The expression of all 26 transcription factors was  
431 examined in xylem cDNA libraries obtained from two OE lines and two RNAi lines. Over-  
432 expression of *PdWND1B* significantly increased expression of several MYBs. Among these, the  
433 most prominent were *NAC154*, *NAC156*, *MYB18*, *MYB75*, *MYB199*, *MYB167*, *MYB175*, *MYB28*,  
434 *MYB31* and *MYB189*, where the expression was increased by 3 to 9-fold (Figure 7A). However,  
435 the expression of two genes, *WIN2A* and *MYB165* was decreased by up to 65% in the same OE  
436 lines. In *PdWND1B* RNAi lines, expression of *WIN2A*, *MYB18*, *MYB152*, and *MYB175* were  
437 increased by 2- to 3-fold while that of *WIN2B*, *MYB2*, and *MYB161* were reduced by 60 to 80%  
438 compared to controls (Figure 7B).

439  
440 In a previous study, over-expression of *PtrWND2B* induced expression of *PtrWND1A* and *B*,  
441 *PtrWND2A*, and *PtrWND6A* and *B* (Zhong *et al.*, 2011). However, over-expression of *PdWND1B*  
442 induced only *PdWND6A* in our study. Also, *PtrWND2B* induced expression of all transcription  
443 factors except *PtrMYB152* (Wang *et al.*, 2014). In contrast, several transcription factors were not  
444 induced in our study, suggesting that *WND1B* and *WND2B* may have distinct targets with some  
445 overlap. Alternatively, in the previous study, gene expression was quantified in leaf tissue where  
446 secondary wall formation is uncommon, while our study employed developing xylem tissue where  
447 secondary cell wall biosynthesis-related genes are viewed to be more specifically regulated by  
448 those TFs. The increase in *PdWND2A* in the *PdWND1B* suppression lines indicates the existence  
449 of a compensatory mechanism. Although induction of *PdWND2A* or, more likely, other MYBs  
450 compensated for cell wall composition, they did not compensate and maintain normal growth in  
451 RNAi lines. In herbaceous plants such as *Arabidopsis*, *snd1* or *nst1* single mutants had no obvious  
452 growth defects, but *snd1 nst1* double mutants had severely affected stem strength suggesting that  
453 either one is sufficient for proper growth (Zhong *et al.*, 2007a). In *Arabidopsis*, over-expression  
454 of *AtSND1* induced expression of *AtMYB46* (Zhong *et al.*, 2007b), but over-expression of  
455 *PdWND1B* did not induce expression of *PdMYB002* and *PdMYB021*, the homologs of *AtMYB46*,  
456 implying the existence of potential species-specific regulation. Over-expression of *AtSND1* and  
457 *AtNST1* induced expression of *AtMYB58*. However, only *AtNST1* induced *AtMYB63* (Zhou *et al.*,  
458 2009). Our results were consistent with *Arabidopsis* in that over-expression of *PdWND1B* induced  
459 expression of *PdMYB28*, the closest homolog of *AtMYB58* but not *PdMYB192*, the closest

460 homolog of *AtMYB63*, suggesting that WND/NAC master regulators have both redundant and  
461 distinct gene targets, and exhibit species-specificity in downstream regulation. *AtMYB58* and  
462 *AtMYB63* induced lignin formation but not cellulose and hemicellulose formation, suggesting that  
463 individual MYBs are specific to each pathway (Zhou *et al.*, 2009). Relative to *PdWND1B* RNAi  
464 lines, the observed greater impact of *PdWND1B* overexpression on expression of cell wall  
465 transcription factor genes was also observed on expression of secondary cell wall (Shi *et al.* 2021)  
466 and sugar metabolism related genes (Figure 8).

467

### 468 **Promoter binding and transcriptional activation**

469 *PdWND1B* has been previously reported as a transcription activator and is found to bind to  
470 promoters of *MYB002* (Lin *et al.* 2013), as well as the newly reported cell wall transcriptional  
471 regulators, *HB3* (Badmi *et al.* 2018) and *EPSP* (Xie *et al.* 2018), in *Populus*. Transactivation assays  
472 confirmed that *PdWND1B* acts as a transcriptional activator and not as a transcriptional repressor  
473 (Supplemental File 5). *In vivo* DNA binding assay using micro-chromatin immunoprecipitation  
474 ( $\mu$ ChIP) confirmed the binding of *PdWND1B* on the promoter of *PdMYB002*, a known target of  
475 Ptr-SND1-B1 (Lin *et al.*, 2013) (Supplemental File 6), pointing to the overlapping functions of  
476 two poplar NAC homologs. Overexpression of *PdWND1B* induces the expression of a gene  
477 encoding 5-Enolpyruvylshikimate 3-Phosphate Synthase (EPSP), an enzyme that has been  
478 demonstrated activity as a transcriptional repressor and is involved in lignin biosynthesis (Xie *et*  
479 *al.*, 2018). ChIP and transactivation assays suggest that *PdWND1B* binds to the promoters of the  
480 two *Populus EPSP* homologs, *EPSP1* and *EPSP2*, and activates their transcription *in vivo*  
481 (Supplemental File 7). These results indicate that *PdWND1B* is the upstream regulator of EPSP in  
482 lignin biosynthesis. The HD-ZIP III family of transcription factors have known roles in stem  
483 development (Robischon *et al.*, 2011; Zhu *et al.*, 2013). *PdWND1B* binds to the two homologs of  
484 the HD-ZIP III family of transcription factors, *PtHB3* and *PtHB4* and activates their transcription  
485 *in vivo* (Supplemental File 8). It has also previously been reported that *PdWND1B* binds to the  
486 promoter of a calmodulin binding protein *PdIQD10*, which is also involved in secondary cell wall  
487 biosynthesis (Badmi *et al.*, 2018). Our results provide molecular evidence to further substantiate  
488 the role of *PdWND1B* as a master regulator of secondary cell wall biosynthesis during woody stem  
489 development in *P. deltoides*.

490



## 491 **Conclusion**

492 Secondary cell wall composition depends on expression of *WND* transcription factors. The  
493 functional role of *WND1B* in *Populus* was studied by over-expression and down-regulation under  
494 the control of a xylem specific promoter. Over-expression of *PdWND1B* induced a cascade of  
495 transcription factors and structural genes involved in secondary cell wall biosynthesis. Phenotypic  
496 changes were aligned with molecular changes, specifically, over-expression of *PdWND1B* resulted  
497 increased lignin and xylose content, but decreased glucose resulting in a significant reduction in  
498 ethanol conversion. Down-regulation of *PdWND1B*, on the other hand, did not consistently alter  
499 lignin and cellulose content in stems but did impact other wall components and resulted in stunted  
500 growth. It is plausible that a functional compensation, as has been reported before, by other NAC  
501 members including *WND2A* and MYBs such as *MYB18*, *MYB152* and *MYB175*, in part explains  
502 the lack of significant impact on cell wall chemistry as a result of down-regulation of *PdWND1B*.  
503 Taken in total, our results suggest that *PdWND1B* does play a functional role in secondary cell  
504 wall biosynthesis through coordination with transcription factors and structural genes, which is  
505 further supported by the molecular evidence of its function to activate the transcription of several  
506 secondary cell wall pathway genes reported in the literature. In the future, studies designed to  
507 dissect the redundant and non-redundant functions of *PdWND1B*, its other homologs, and  
508 downstream transcription factors in stem, as well as root tissues, are needed to shed important and  
509 timely light on the redundant, conserved, and divergent mechanisms of plant biomass chemistry  
510 and productivity. Such fundamental understanding is critical to developing biodesign-based  
511 approaches to co-optimize aboveground performance for bio-derived fuels and products and soil  
512 health belowground.

513

## 514 **Figures and Tables**

515 Figure 1. Phylogenetic analysis of selected secondary cell wall associated NAC transcription  
516 factors from *Populus* and other plant species

517 Figure 2. Relative expression of *PdWND1B* in control and transgenic lines

518

519 Figure 3. Growth and biomass productivity in control and *PdWND1B* transgenic lines

520

521 Figure 4. Stem cell wall composition of control and *PdWND1B* transgenic lines

522

523 Figure 5. Sugar composition in stem cell walls of control and *PdWND1B* transgenic lines

524

525 Figure 6. Glucose release and ethanol conversion efficiency from stems of control and *PdWND1B*

526 transgenic lines

527

528 Figure 7. Expression of secondary cell wall related transcription factors in control and *PdWND1B*

529 transgenic lines

530

531 Figure 8. Expression of secondary cell wall related and sugar metabolism related genes in control  
532 and *PdWND1B* transgenic lines

533

#### 534 **Supplemental Files**

535 Supplemental File 1. List of gene models and their primer sequence information.

536

537 Supplemental File 2. Percentage protein similarity matrix of selected secondary wall associated  
538 transcription factors from *Populus* and other species.

539 Supplemental File 3. Expression of the six *NAC* genes in different tissues of *Populus*.

540 Supplemental File 4. Localization of the PdWND1A and PdWND1B in tobacco epidermal cells.

541 Supplemental File 5. Plant height (A) and lignin content (B) in control (Con) and *PdWND1B* over-  
542 expression (OE) and RNAi suppression (Ri) lines.

543

544 Supplemental File 6. PdWND1B has transcriptional activator activity.

545 Supplemental File 7. PdWND1B binds to promoter of *MYB002* secondary cell wall transcription  
546 factor gene.

547 Supplemental File 8. PdWND1B regulates the expression of *EPSP* genes *in vivo*.

548 Supplemental File 9. PdWND1B regulates the expression of *HB3-like* genes *in vivo*.

549

550 **Abbreviations:**

551 4CL, 4-coumarate-*CoA* ligase; DAPI, 4,6'-diamidino-2-phenylindole; CTAB,  
552 cetyltrimethylammonium bromide; HPLC, high performance liquid chromatography; LPI, leaf  
553 plastochron index; MEGA, Molecular Evolutionary Genetics Analysis; NAC, NAM, ATAF1/2  
554 and CUC2; NST, NAC secondary wall thickening promoting factor; PBS, phosphate-buffered  
555 saline; qRT-PCR, quantitative reverse transcriptase; *PAL*, phenylalanine ammonia lyase; PCR;  
556 RNAi, RNA interference; S:G, syringyl to guaiacyl ratio; SHF, separate hydrolysis and  
557 fermentation; SHN, SHINE; SND, secondary wall associated NAC domains; VND, vascular  
558 related NAC domain; WND, wood associated NAC domain transcription factors. *4CL*, 4-  
559 coumarate:CoA ligase; *COMT*, caffeic acid/5-hydroxyconiferaldehyde O-methyltransferase; *CCR*,  
560 cinnamoyl-CoA reductase; *CesA*, Cellulose synthase; *KOR*, Korrigan; *GT43*, Glucosyltransferase  
561 family 43; *SUSY*, sucrose synthase.

562

563 **Funding**

564 This work was supported by the United States Department of Energy (DOE) BioEnergy Science  
565 Center and Center for Bioenergy Innovation projects. The BioEnergy Science Center and Center  
566 for Bioenergy Innovation are a Bioenergy Research Center supported by the Office of Biological  
567 and Environmental Research in the DOE Office of Science. This manuscript has been authored by  
568 UT-Battelle, LLC under Contract No. DE-AC05-00OR22725 with the U.S. Department of Energy.

569

570 **Acknowledgements**

571 We thank Brock Carter and Zackary Moore for inventory, propagation and maintenance of plants  
572 in ORNL greenhouses. This manuscript has been authored by UT-Battelle, LLC under Contract  
573 No. DE-AC05-00OR22725 with the U.S. Department of Energy. The United States Government  
574 retains and the publisher, by accepting the article for publication, acknowledges that the United  
575 States Government retains a non-exclusive, paid-up, irrevocable, world-wide license to publish or  
576 reproduce the published form of this manuscript, or allow others to do so, for United States  
577 Government purposes. The Department of Energy will provide public access to these results of  
578 federally sponsored research in accordance with the DOE Public Access  
579 Plan(<http://energy.gov/downloads/doe-public-access-plan>).

580

581 **References**

582 **Adli, M., & Bernstein, B. E.** 2011. Whole-genome chromatin profiling from limited numbers of  
583 cells using nano-ChIP-seq. *Nature protocols*, 6(10), 1656–1668.

584 **Aida M, Ishida T, Fukaki H, Fujisawa H, Tasaka M.** 1997. Genes involved in organ separation  
585 in *Arabidopsis*: an analysis of the cup-shaped cotyledon mutant. *The Plant cell* **9**, 841-857.

586 **Ambavaram MMR, Krishnan A, Trijatmiko KR, Pereira A.** 2011. Coordinated activation of  
587 cellulose and repression of lignin biosynthesis pathways in rice. *Plant Physiology* **155**, 916-931.

588 **Badmi, R., Payyavula, R. S., Bali, G., Guo, H.-B., Jawdy, S. S., Gunter, L. E., Yang, X.,**  
589 **Winkeler, K. A., Collins, C., Rottmann, W. H., Yee, K., Rodriguez, M., Sykes, R. W.,**

590 **Decker, S. R., Davis, M. F., Ragauskas, A. J., Tuskan, G. A., & Kalluri, U. C.** (2018). A  
591 New Calmodulin-Binding Protein Expresses in the Context of Secondary Cell Wall Biosynthesis  
592 and Impacts Biomass Properties in Populus. *Frontiers in Plant Science*, 9, 1669.

593 <https://doi.org/10.3389/fpls.2018.01669>

594 **Bailey W.** 1938. Cell wall structure of higher plants. *Industrial & Engineering Chemistry* **30**, 40-  
595 47.

596 **Boerjan W, Ralph J, Baucher M.** 2003. Lignin biosynthesis. *Annual Review of Plant Biology*  
597 **54**, 519-546.

598 **Caiping M, Strauss SH, Meilan R.** 2004. Agrobacterium-mediated transformation of the  
599 genome-sequenced poplar clone, Nisqually-1 (*Populus trichocarpa*). *Plant Molecular Biology*  
600 *Reporter* **22**, 311-312.

601 **Dahl J.A. Collas P.** 2008. A rapid micro chromatin immunoprecipitation assay (ChIP). *Nature*  
602 *Protocols*, 3, 1032-1045.

603 **Darvill J, McNeil M, Darvill A, Albersheim P.** 1980. Structure of plant cell walls. XI.  
604 Glucuronoarabinoxylan, a second hemicellulose in the primary cell walls of suspension-cultured  
605 sycamore cells. *Plant Physiology* **66**, 1135-1139.

606 **DePaoli HC, Brito MS, Quiapim AC, Teixeira SP, Goldman GH, Dornelas MC, Goldman**  
607 **MHS.** 2011. Stigma/style cell cycle inhibitor 1 (SCI1), a tissue-specific cell cycle regulator that  
608 controls upper pistil development. *New Phytologist* **190**, 882-895.

609 **Doblin MS, Kurek I, Jacob-Wilk D, Delmer DP.** 2002. Cellulose biosynthesis in plants: from  
610 genes to rosettes. *Plant and Cell Physiology* **43**, 1407-1420.

- 611 **Fu C, Mielenz JR, Xiao X, Ge Y, Hamilton CY, Rodriguez M, Chen F, Foston M, Ragauskas**  
612 **A, Bouton J, Dixon RA, Wang Z-Y.** 2011. Genetic manipulation of lignin reduces recalcitrance  
613 and improves ethanol production from switchgrass. *Proceedings of the National Academy of*  
614 *Sciences* **108**, 3803-3808.
- 615 **Guo J., Morrell-Falvey J.L., Labbé J.L., Muchero W., Kalluri U.C., Tuskan G.A. & Chen**  
616 **J.-G.** 2012 Highly Efficient Isolation of Populus Mesophyll Protoplasts and Its Application in  
617 Transient Expression Assays. PLOS ONE, 7, e44908.
- 618 **He X-J, Mu R-L, Cao W-H, Zhang Z-G, Zhang J-S, Chen S-Y.** 2005. AtNAC2, a transcription  
619 factor downstream of ethylene and auxin signaling pathways, is involved in salt stress response  
620 and lateral root development. *The Plant Journal* **44**, 903-916.
- 621 **Hibara K-i, Takada S, Tasaka M.** 2003. CUC1 gene activates the expression of SAM-related  
622 genes to induce adventitious shoot formation. *The Plant Journal* **36**, 687-696.
- 623 **Hu R, Qi G, Kong Y, Kong D, Gao Q, Zhou G.** 2010. Comprehensive analysis of NAC domain  
624 transcription factor gene family in *Populus trichocarpa*. *BMC Plant Biology* **10**, 145.
- 625 **Hu W-J, Harding SA, Lung J, Popko JL, Ralph J, Stokke DD, Tsai C-J, Chiang VL.** 1999.  
626 Repression of lignin biosynthesis promotes cellulose accumulation and growth in transgenic trees.  
627 *Nature Biotech* **17**, 808-812.
- 628 **Ko J-H, Yang SH, Park AH, Lerouxel O, Han K-H.** 2007. ANAC012, a member of the plant-  
629 specific NAC transcription factor family, negatively regulates xylary fiber development in  
630 *Arabidopsis thaliana*. *The Plant Journal* **50**, 1035-1048.
- 631 **Li Q, Lin Y-C, Sun Y-H, Song J, Chen H, Zhang X-H, Sederoff RR, Chiang VL.** 2012. Splice  
632 variant of the SND1 transcription factor is a dominant negative of SND1 members and their  
633 regulation in *Populus trichocarpa*. *Proceedings of the National Academy of Sciences* **109**, 14699-  
634 14704.
- 635 **Lin, Y.-C. J., Chen, H., Li, Q., Li, W., Wang, J. P., Shi, R., Tunlaya-Anukit, S., Shuai, P.,**  
636 **Wang, Z., Ma, H., Li, H., Sun, Y.-H., Sederoff, R. R., & Chiang, V. L.** (2017). Reciprocal  
637 cross-regulation of VND and SND multigene TF families for wood formation in *Populus*  
638 *trichocarpa*. *Proceedings of the National Academy of Sciences*, *114*(45), E9722.  
639 <https://doi.org/10.1073/pnas.1714422114>
- 640 **Lin, Y.-C., Li, W., Sun, Y.-H., Kumari, S., Wei, H., Li, Q., Tunlaya-Anukit, S., Sederoff, R.**  
641 **R., & Chiang, V. L.** (2013). SND1 Transcription Factor-Directed Quantitative Functional

642 Hierarchical Genetic Regulatory Network in Wood Formation in *Populus trichocarpa*. *The Plant*  
643 *Cell*, 25(11), 4324–4341. <https://doi.org/10.1105/tpc.113.117697>

644 **Livak KJ, Schmittgen TD.** 2001. Analysis of relative gene expression data using real-time  
645 quantitative PCR and the  $2^{-\Delta\Delta C(T)}$  method. *Methods* **25**, 402-408.

646 **McCarthy RL, Zhong R, Ye Z-H.** 2011. Secondary wall NAC binding element (SNBE), a key  
647 cis-acting element required for target gene activation by secondary wall NAC master switches.  
648 *Plant Signaling & Behavior* **6**, 1282-1285.

649 **Mielenz JR, Sykes R, Yung M, Novaes E, Kirst M, Peter G, Davis M.** 2009. High-throughput  
650 screening of plant cell-wall composition using pyrolysis molecular beam mass spectroscopy.  
651 *Biofuels*, Vol. 581: Humana Press, 169-183.

652 **Mitsuda N, Iwase A, Yamamoto H, Yoshida M, Seki M, Shinozaki K, Ohme-Takagi M.** 2007.  
653 NAC Transcription factors, NST1 and NST3, are key regulators of the formation of secondary  
654 walls in woody tissues of *Arabidopsis*. *The Plant cell* **19**, 270-280.

655 **Mitsuda N, Ohme-Takagi M.** 2008. NAC transcription factors NST1 and NST3 regulate pod  
656 shattering in a partially redundant manner by promoting secondary wall formation after the  
657 establishment of tissue identity. *The Plant Journal* **56**, 768-778.

658 **Nicholas KB, Nicholas HBJ, Deerfield DWI.** 1997. GeneDoc: Analysis and visualization of  
659 genetic variation. *GeneDoc: Analysis and visualization of genetic variation* **4**, 14.

660 **Ohtani M, Nishikubo N, Xu B, Yamaguchi M, Mitsuda N, Goué N, Shi F, Ohme-Takagi M,**  
661 **Demura T.** 2011. A NAC domain protein family contributing to the regulation of wood formation  
662 in poplar. *The Plant Journal* **67**, 499-512.

663 **Olsen AN, Ernst HA, Leggio LL, Skriver K.** 2005. NAC transcription factors: structurally  
664 distinct, functionally diverse. *Trends in Plant Science* **10**, 79-87.

665 **Ooka H, Satoh K, Doi K, Nagata T, Otomo Y, Murakami K, Matsubara K, Osato N, Kawai**  
666 **J, Carninci P, Hayashizaki Y, Suzuki K, Kojima K, Takahara Y, Yamamoto K, Kikuchi S.**  
667 2003. Comprehensive analysis of NAC family genes in *Oryza sativa* and *Arabidopsis thaliana*.  
668 *DNA Research* **10**, 239-247.

669 **Pinheiro GL, Marques CS, Costa MDBL, Reis PAB, Alves MS, Carvalho CM, Fietto LG,**  
670 **Fontes EPB.** 2009. Complete inventory of soybean NAC transcription factors: Sequence  
671 conservation and expression analysis uncover their distinct roles in stress response. *Gene* **444**, 10-  
672 23.

- 673 **Plomion C, Leprovost G, Stokes A.** 2001. Wood formation in trees. *Plant Physiology* **127**, 1513-  
674 1523.
- 675 **Robischon, M., Du, J., Miura, E., & Groover, A.** (2011). The Populus Class III HD ZIP,  
676 popREVOLUTA, Influences Cambium Initiation and Patterning of Woody Stems. *Plant*  
677 *Physiology*, *155*(3), 1214. <https://doi.org/10.1104/pp.110.167007>
- 678 **Shi R., Sun Y.H., Li Q., Heber S., Sederoff R. & Chiang V.L.** (2010) Towards a systems  
679 approach for lignin biosynthesis in Populus trichocarpa: transcript abundance and specificity of  
680 the monolignol biosynthetic genes. *Plant Cell Physiol*, *51*, 144-163.
- 681 **Sparkes IA, Runions J, Kearns A, Hawes C.** 2006. Rapid, transient expression of fluorescent  
682 fusion proteins in tobacco plants and generation of stably transformed plants. *Nature Protocols* **1**,  
683 2019-2025.
- 684 **Studer MH, DeMartini JD, Davis MF, Sykes RW, Davison B, Keller M, Tuskan GA, Wyman**  
685 **CE.** 2011. Lignin content in natural *Populus* variants affects sugar release. *Proceedings of the*  
686 *National Academy of Sciences* **108**, 6300-6305.
- 687 **Tamura K, Peterson D, Peterson N, Stecher G, Nei M, Kumar S.** 2011. MEGA5: Molecular  
688 Evolutionary Genetics Analysis using maximum likelihood, evolutionary distance, and maximum  
689 parsimony methods. *Molecular Biology and Evolution* **28**, 2731-2739.
- 690 **Tsuyoshi N, Sumie I, Tetsuya K.** 2009. Gateway vectors for plant transformation. *Plant*  
691 *Biotechnology* **26**, 275-284.
- 692 **Tuskan GA, DiFazio S, Jansson S, Bohlmann J, Grigoriev I, Hellsten U, Putnam N, Ralph S,**  
693 **Rombauts S, Salamov A, Schein J, Sterck L, Aerts A, Bhalerao RR, Bhalerao RP, Blaudez**  
694 **D, Boerjan W, Brun A, Brunner A, Busov V, Campbell M, Carlson J, Chalot M, Chapman**  
695 **J, Chen G-L, Cooper D, Coutinho PM, Couturier J, Covert S, Cronk Q, Cunningham R,**  
696 **Davis J, Degroeve S, Déjardin A, dePamphilis C, Detter J, Dirks B, Dubchak I, Duplessis S,**  
697 **Ehlting J, Ellis B, Gendler K, Goodstein D, Gribskov M, Grimwood J, Groover A, Gunter**  
698 **L, Hamberger B, Heinze B, Helariutta Y, Henrissat B, Holligan D, Holt R, Huang W, Islam-**  
699 **Faridi N, Jones S, Jones-Rhoades M, Jorgensen R, Joshi C, Kangasjärvi J, Karlsson J,**  
700 **Kelleher C, Kirkpatrick R, Kirst M, Kohler A, Kalluri U, Larimer F, Leebens-Mack J, Leplé**  
701 **J-C, Locascio P, Lou Y, Lucas S, Martin F, Montanini B, Napoli C, Nelson DR, Nelson C,**  
702 **Nieminen K, Nilsson O, Pereda V, Peter G, Philippe R, Pilate G, Poliakov A, Razumovskaya**  
703 **J, Richardson P, Rinaldi C, Ritland K, RouzÃ© P, Ryabov D, Schmutz J, Schrader J,**

704 **Segerman B, Shin H, Siddiqui A, Sterky F, Terry A, Tsai C-J, Uberbacher E, Unneberg P,**  
705 **Vahala J, Wall K, Wessler S, Yang G, Yin T, Douglas C, Marra M, Sandberg G, Van de Peer**  
706 **Y, Rokhsar D.** 2006. The genome of black cottonwood, *Populus trichocarpa* (Torr. & Gray).  
707 *Science* **313**, 1596-1604.

708 **Updegraff DM.** 1969. Semimicro determination of cellulose in biological material. *Analytical*  
709 *Biochemistry* **32**, 420-424.

710 **Wang, S., Chang, Y., Guo, J. and Chen, J.-G.** 2007. Arabidopsis Ovate Family Protein 1 is a  
711 transcriptional repressor that suppresses cell elongation. *The Plant Journal*, 50: 858-872.  
712 <https://doi.org/10.1111/j.1365-313X.2007.03096.x>

713 **Wang, S., Li, E., Porth, I., Chen, J.-G., Mansfield, S. D., & Douglas, C. J.** 2014. Regulation  
714 of secondary cell wall biosynthesis by poplar R2R3 MYB transcription factor PtrMYB152 in  
715 *Arabidopsis*. *Scientific Reports*, 4, 5054–5054. PubMed. <https://doi.org/10.1038/srep05054>

716 **Xie, M., Muchero, W., Bryan, A. C., Yee, K., Guo, H.-B., Zhang, J., Tschaplinski, T. J.,**  
717 **Singan, V. R., Lindquist, E., Payyavula, R. S., Barros-Rios, J., Dixon, R., Engle, N., Sykes,**  
718 **R. W., Davis, M., Jawdy, S. S., Gunter, L. E., Thompson, O., DiFazio, S. P., ... Tuskan, G.**  
719 **A.** (2018). A 5-Enolpyruvylshikimate 3-Phosphate Synthase Functions as a Transcriptional  
720 Repressor in *Populus*. *The Plant Cell*, 30(7), 1645.  
721 <https://doi.org/10.1105/tpc.18.00168>

722 **Xie Q, Frugis G, Colgan D, Chua N-H.** 2000. *Arabidopsis* NAC1 transduces auxin signal  
723 downstream of TIR1 to promote lateral root development. *Genes & Development* **14**, 3024-3036.

724 **Yamaguchi M, Demura T.** 2010. Transcriptional regulation of secondary wall formation  
725 controlled by NAC domain proteins. *Plant Biotechnology* **27**, 237-242.

726 **Yamaguchi M, Kubo M, Fukuda H, Demura T.** 2008. VASCULAR-RELATED NAC-  
727 DOMAIN7 is involved in the differentiation of all types of xylem vessels in *Arabidopsis* roots and  
728 shoots. *The Plant Journal* **55**, 652-664.

729 **Yang, Y., Yoo, C. G., Rottmann, W., Winkeler, K. A., Collins, C. M., Gunter, L. E., Jawdy,**  
730 **S. S., Yang, X., Pu, Y., Ragauskas, A. J., Tuskan, G. A., & Chen, J.-G.** (2019). PdWND3A, a  
731 wood-associated NAC domain-containing protein, affects lignin biosynthesis and composition in  
732 *Populus*. *BMC Plant Biology*, 19(1), 486. <https://doi.org/10.1186/s12870-019-2111-5>

733 **Yee K, Rodriguez Jr M, Tschaplinski T, Engle N, Martin M, Fu C, Wang Z-Y, Hamilton-**  
734 **Brehm S, Mielenz J.** 2012. Evaluation of the bioconversion of genetically modified switchgrass



735 using simultaneous saccharification and fermentation and a consolidated bioprocessing approach.  
736 *Biotechnology for Biofuels* **5**, 81.

737 **Zhao Y, Sun J, Xu P, Zhang R, Li L.** 2014. Intron-mediated alternative splicing of WOOD-  
738 ASSOCIATED NAC TRANSCRIPTION FACTOR1B regulates cell wall thickening during fiber  
739 development in *Populus* species. *Plant Physiology* **164**, 765-776.

740 **Zhong R, Demura T, Ye Z-H.** 2006. SND1, a NAC domain transcription factor, is a key regulator  
741 of secondary wall synthesis in fibers of *Arabidopsis*. *The Plant cell* **18**, 3158-3170.

742 **Zhong R, Lee C, Ye Z-H.** 2010. Functional characterization of poplar wood-associated NAC  
743 domain transcription factors. *Plant Physiology* **152**, 1044-1055.

744 **Zhong R, McCarthy RL, Lee C, Ye Z-H.** 2011. Dissection of the transcriptional program  
745 regulating secondary wall biosynthesis during wood formation in poplar. *Plant Physiology* **157**,  
746 1452-1468.

747 **Zhong R, Richardson E, Ye Z-H.** 2007a. Two NAC domain transcription factors, SND1 and  
748 NST1, function redundantly in regulation of secondary wall synthesis in fibers of *Arabidopsis*.  
749 *Planta* **225**, 1603-1611.

750 **Zhong R, Richardson EA, Ye Z-H.** 2007b. The MYB46 transcription factor is a direct target of  
751 SND1 and regulates secondary wall biosynthesis in *Arabidopsis*. *The Plant cell* **19**, 2776-2792.

752 **Zhou J, Lee C, Zhong R, Ye Z-H.** 2009. MYB58 and MYB63 are transcriptional activators of  
753 the lignin biosynthetic pathway during secondary cell wall formation in *Arabidopsis*. *The Plant*  
754 *cell* **21**, 248-266.

755 **Zhu, Y., Song, D., Sun, J., Wang, X., & Li, L.** (2013). PtrHB7, a class III HD-Zip Gene, Plays  
756 a Critical Role in Regulation of Vascular Cambium Differentiation in *Populus*. *Molecular Plant*,  
757 *6*(4), 1331–1343. <https://doi.org/10.1093/mp/sss164>

758

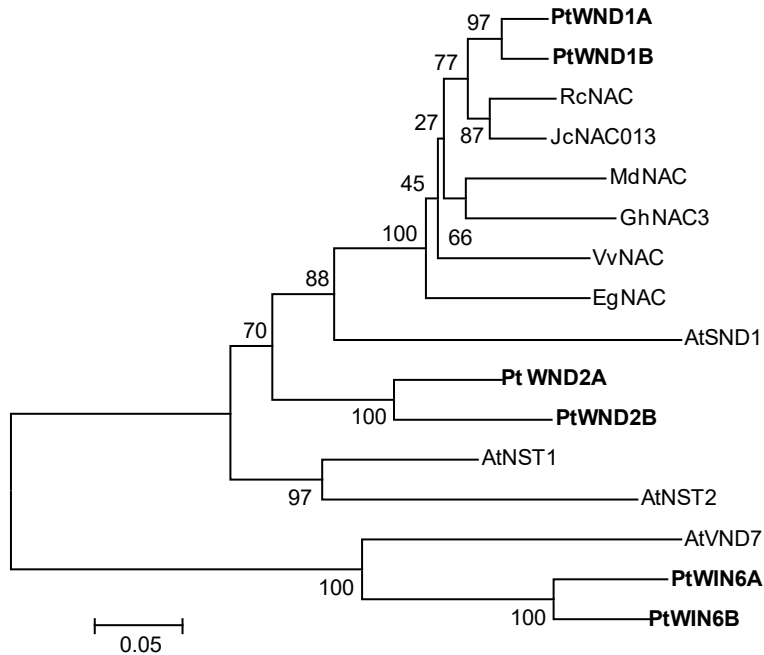

759

760 **Figure 1. Phylogenetic analysis of selected secondary cell wall associated NAC transcription**

761 **factors from *Populus* and other plant species.** Transcription factors from *Populus* are in bold.

762 The percentage of replicate trees in which the associated taxa clustered together in the bootstrap

763 test (500 replicates) are shown next to the branches. Accessions are provided below. AtSND1:

764 At1g32770 (*Arabidopsis thaliana*); AtNST1: At2g46770; AtNST2: At3g61910; AtVND7:

765 AT1G71930; RcNAC: XP\_002518924 (*Ricinus communis*); VvNAC: XP\_002279545 (*Vitis*

766 *vinifera*); JcNAC013: AGL39669 (*Jatropha curcas*); MdNAC: NP\_001280877 (*Malus*

767 *domestica*), GhNAC3: ADN39415 (*Gossypium hirsutum*); EgNAC: KCW72583 (*Eucalyptus*

768 *grandis*). PtWND1A (Potri.011G153300), PtWND1B (Potri.001G448400), PtWND2A

769 (Ptri.014G104800), WND2B (Potri.002G178700), PtWND6A (Potri.013G113100) and

770 PtWND6B (Potri.019G083600).

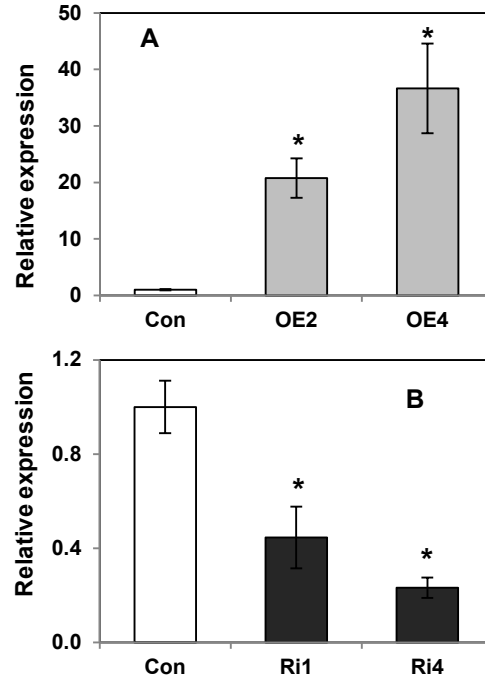

771

772

773 **Figure 2. Relative expression of *PdWND1B* in control and transgenic lines.** Gene expression  
774 (arbitrary units) in control (Con), over-expression (OE) lines (A), and RNAi suppressed (Ri) lines  
775 (B) was relative to the housekeeping genes *Ubiquitin conjugating enzyme E2* and *18S RNA*. The  
776 data represents means  $\pm$  SE (n = 3). \* Indicates statistical significance based on Student's *t*-test (p  
777  $\leq$  0.05).

778

779

780

781

782

783

784

785

786

787

788

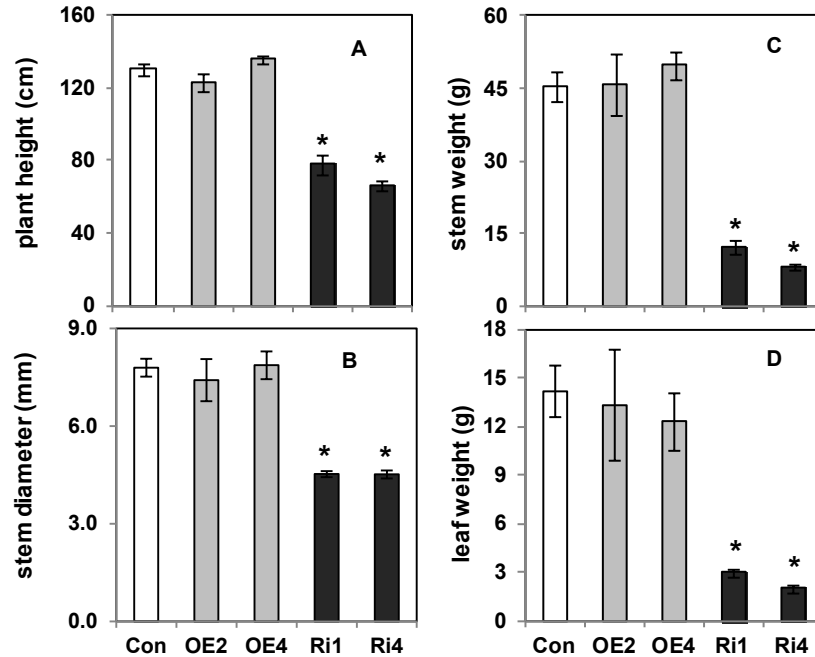

789

790

791 **Figure 3. Growth and biomass productivity in control and *PdWND1B* transgenic lines.** Plant  
792 height (A), stem diameter (B), stem weight (C), leaf weight (D) of empty vector transformed  
793 control (Con), and *PdWND1B* over-expression (OE) and RNAi suppressed (Ri) lines. The data  
794 represents means  $\pm$  SE (n = 3). \* Indicates statistical significance based on Student's *t*-test (p  $\leq$   
795 0.05).

796

797

798

799

800

801

802

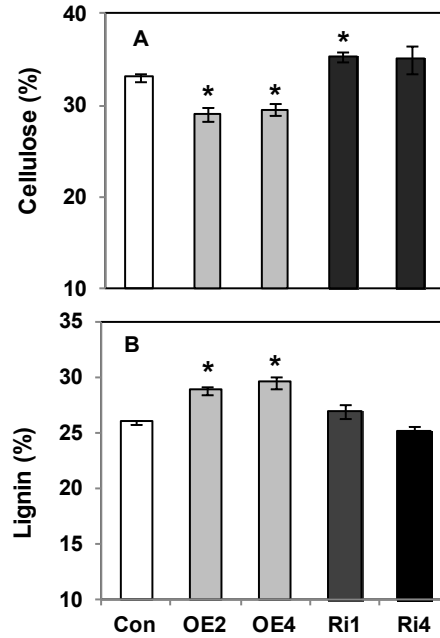

803

804

805 **Figure 4. Stem cell wall composition of control and *PdWND1B* transgenic lines.** Levels of  
806 cellulose (A) and lignin (B) in empty vector transformed control (Con), *PdWND1B* over-  
807 expression (OE), and RNAi suppressed (Ri) lines. The data represents means  $\pm$  SE (n = 3 to 5). \*  
808 Indicates statistical significance based on Student's *t*-test ( $p \leq 0.05$ ).

809

810

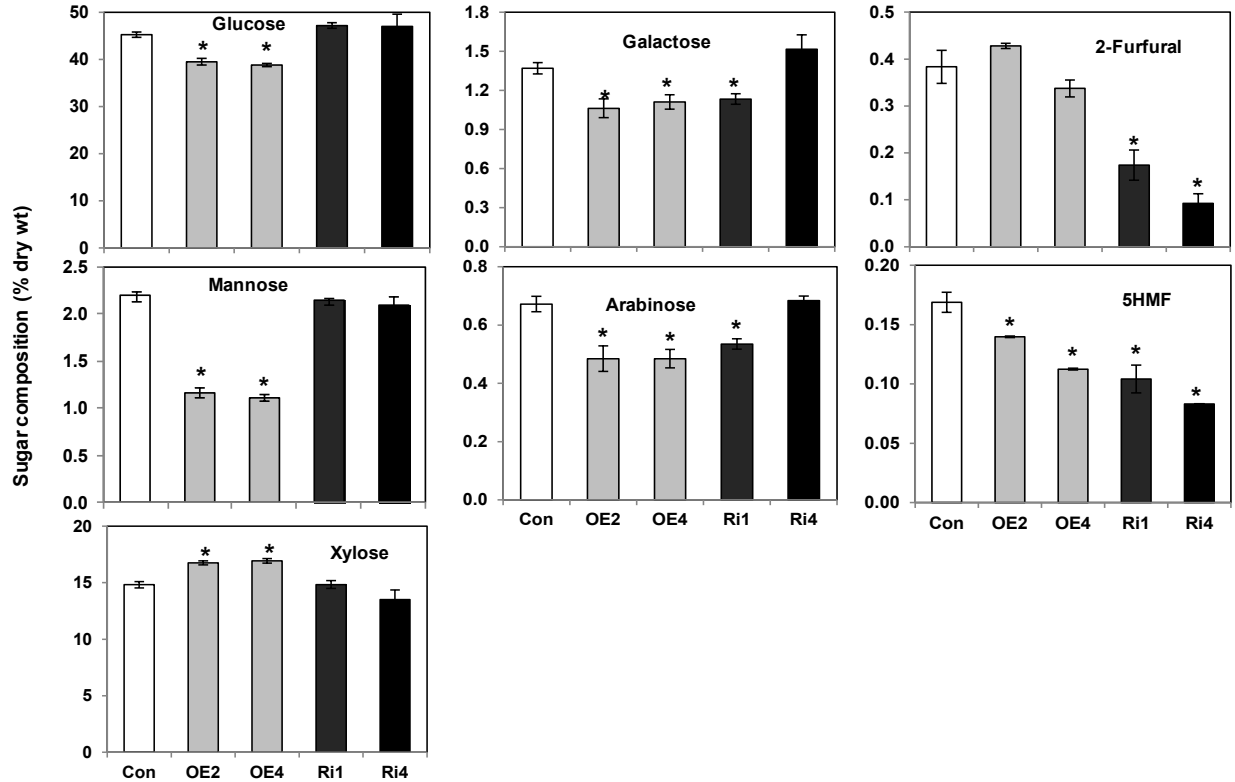

811

812

813 **Figure 5. Sugar composition in stem cell walls of control and *PdWND1B* transgenic lines.**

814 Levels of different sugars in empty vector transformed control (Con), *PdWND1B* over-expression

815 (OE), and RNAi suppressed (Ri) lines. The data represents means  $\pm$  SE (n = 3). \* Indicates

816 statistical significance based on Student's *t*-test ( $p \leq 0.05$ ).

817

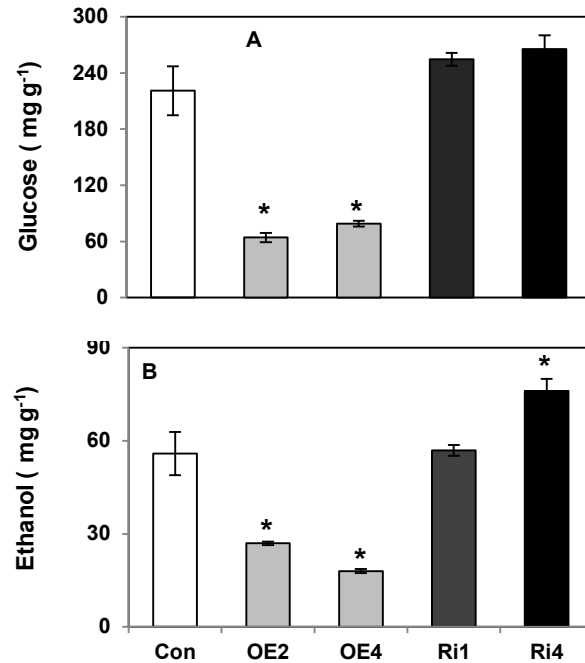

818

819

820 **Figure 6. Glucose release and ethanol conversion efficiency from stems of control and**

821 *PdWND1B* transgenic lines. Levels of glucose (A) and ethanol (B) in empty vector transformed

822 control (Con), *PdWND1B* over-expression (OE), and RNAi suppressed (Ri) lines. The data

823 represents means  $\pm$  SE (n = 3). \* Indicates statistical significance based on Student's *t*-test (p  $\leq$

824 0.05).

825

826

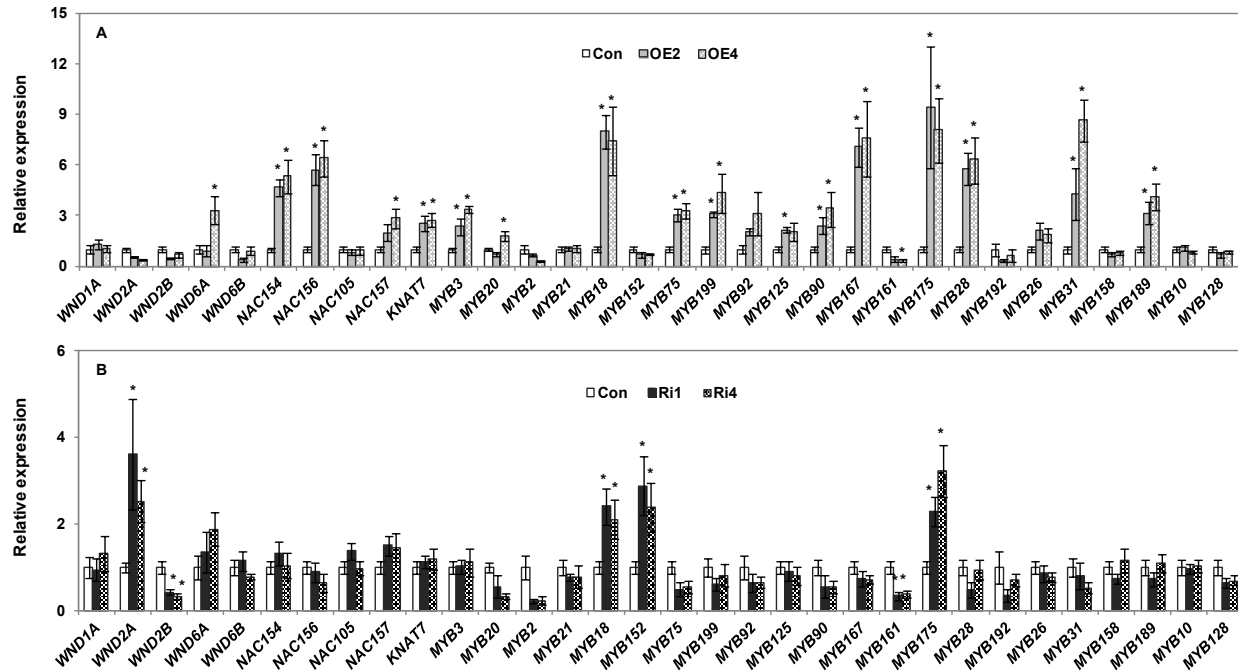

827

828 **Figure 7. Expression of secondary cell wall related transcription factors in control and**  
829 ***PdWND1B* transgenic lines.** Relative gene expression (arbitrary units) in control (Con), over-  
830 expression (OE) lines (A), and RNAi suppressed (Ri) lines (B) was calculated based on the  
831 expression of target genes relative to house-keeping genes, *Ubiquitin conjugating enzyme E2* and  
832 *18S RNA*, and then normalized to control. The data represents means  $\pm$  SE (n = 3). \* indicates  
833 statistically significant,  $p \leq 0.05$  based on Student's *t*-tests.

834

835

836



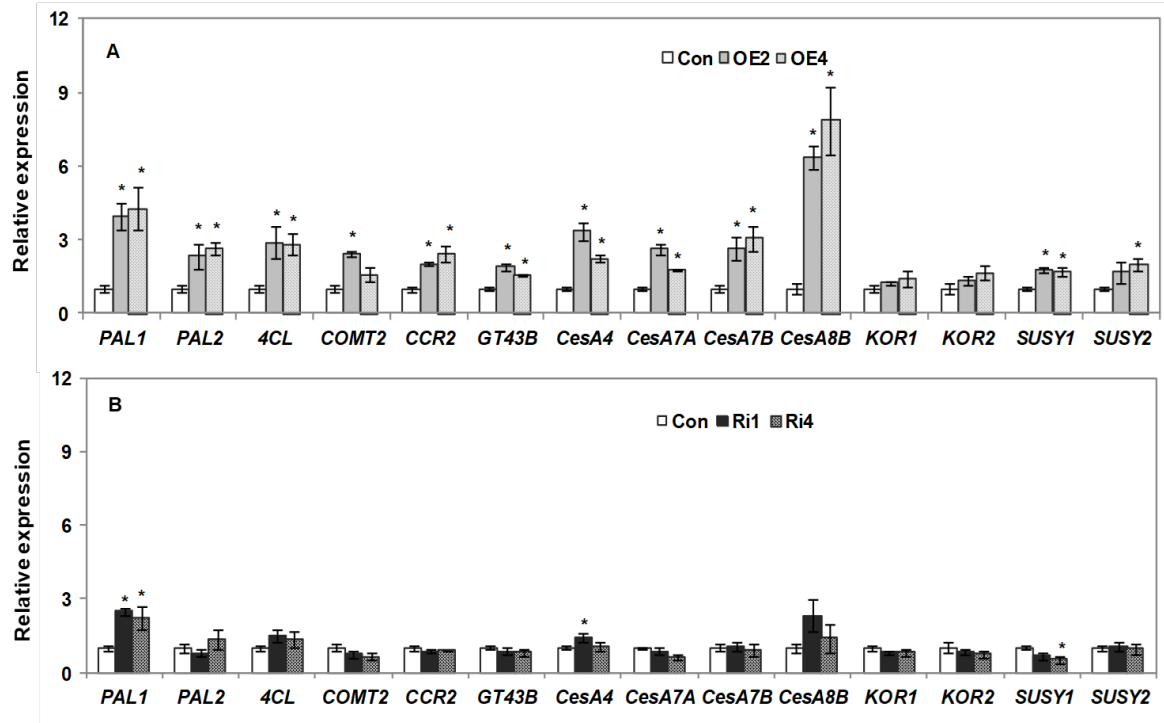

837

838 **Figure 8. Expression of secondary cell wall related and sugar metabolism related genes in**  
839 **control and *PdWND1B* transgenic lines.** Relative gene expression (arbitrary units) in control  
840 (Con), over-expression (OE) lines (A), and RNAi suppressed (Ri) lines (B) was calculated based  
841 on the expression of target genes relative to house-keeping genes, *Ubiquitin conjugating enzyme*  
842 *E2* and *18S RNA*, and then normalized to control. *PAL*, phenylalanine ammonia lyase; *4CL*, 4-  
843 coumarate:CoA ligase; *COMT*, caffeic acid/5-hydroxyconiferaldehyde O-methyltransferase; *CCR*,  
844 cinnamoyl-CoA reductase; *GT43*, Glucosyltransferase family 43; *CesA*, Cellulose synthase; *KOR*,  
845 Korrigan; *SUSY*, sucrose synthase. The data represents means  $\pm$  SE (n = 3). \* indicates statistically  
846 significant,  $p \leq 0.05$  based on Student's *t*-tests.

847

848

849

850

851

852

853 **Supplemental File 1. List of gene models and their primer sequence information.** OE and  
 854 RNAi primers were used to design over-expression and RNAi-knockout construct respectively and  
 855 the rest for qRT-PCR. F and R indicate forward and reverse primers, respectively.  
 856

| <b>Name</b>  | <b>Primer sequence</b>         | <b>Gene Model/Accession</b> |
|--------------|--------------------------------|-----------------------------|
| WND1B-F-OE   | CACCCCCGGGATGCCTGAGGATATGATGAA | Potri.001G448400            |
| WND1B-R-OE   | ACGCGTTTGTATACCGATAAGTGGCAT    |                             |
| WND1B-F-RNAi | CACCCCCGGGCCTTCTATTCCACTAAGCAG |                             |
| WND1B-R-RNAi | TCTAGACATCATCAGGAGAAAGACCA     |                             |
| WND1B-F      | GGAAGGACTTGCAAGATGGAGAA        | Potri.001G448400            |
| WND1B-R      | CCCATCACTGATGCTATTGTCTGAG      |                             |
| WND1A-F2     | TGACCTCATCCTCAATGACTGA         | Potri.011G153300            |
| WND1A-R2     | CCATGAGAATGCTGTTTGTGTG         |                             |
| WND2A-F      | GGACGATAGCACCAGTGATACC         | Potri.014G104800            |
| WND2A-R      | GCCGCCTCCTCTTCCATAAC           |                             |
| WND2B-F      | CCCACCATGACTTATTGTACCC         | Potri.002G178700            |
| WND2B-R      | CCAGAGGTCGATTTCACTGTTAT        |                             |
| WIN6A-F      | AGCCCTAGTACACTTTCAACAA         | Potri.013G113100            |
| WIN6A-R      | GATGCAAGTAAGGTGTCCAAC          |                             |
| WIN6B-F      | GCCCTAGTACACTCTCAACAAG         | Potri.019G083600            |
| WIN6B-R      | GACGCTAGTAAGGTGTCAAAGT         |                             |
| NAC154-F     | GGTACAAAGTAGTGGGCATGA          | Potri.017G016700            |
| NAC154-R     | AAATGGGAGAGTAGCTGTTGAG         |                             |
| NAC156-F     | GGTACAAAGTAGTGGACATGAGG        | Potri.007G135300            |
| NAC156-R     | GTGCAAAATGGGGAAGTAGTTG         |                             |
| NAC105-F     | CCCACCTCAATTTCTCCCTAAT         | Potri.011G058400            |
| NAC105-R     | TGCTCTTCTCTCATCACCAT           |                             |
| NAC157-F     | CAGGCCTCCTTGATCAGTTCTA         | Potri.004G049300            |
| NAC157-R     | GCTCTTCTGATCACATCACTGC         |                             |
| KNAT7-F      | ACTACCGGGTGACACTACTT           | Potri.001G112200            |

|             |                           |                  |
|-------------|---------------------------|------------------|
| KNAT7-R     | TGCCAGTTCCTCTTCCTTTG      |                  |
| MYB3-20-F   | GTGGGTATGGGAGATGGATTT     | Potri.001G267300 |
| MYB3-R      | CAGGTACTATCAAAGTGGTGG     |                  |
| MYB20-R     | GCAAGTATTATCAAAGCAGTTG    | Potri.009G061500 |
| MYB2-F      | GGGATCTTTGGAGGTGTTAATG    | Potri.001G258700 |
| MYB2-R      | GTTAAGACTACTCACGTAGCT     |                  |
| MYB21-F     | GCTCAAGTTGGAGTCCTTAACA    | Potri.009G053900 |
| MYB21-R     | CCATGCAGCTTACACTCTCTAA    |                  |
| MYB18-F     | CAACCTCAACCTCTTCATTAACATC | Potri.004G086300 |
| MYB18-R     | TCCCAACTACTCAAGTCATCATC   |                  |
| MYB152-F    | TCGTCATCGACATCATCTTCTTC   | Potri.017G130300 |
| MYB152-R    | CACCGACAGCATCACTGATTA     |                  |
| MYB75-F     | CCAAGCCACGAGAGAAGATTAC    | Potri.015G129100 |
| MYB75-199-R | TTGCCACCCATGTCTAGGATAC    |                  |
| MYB199-F    | CAAGCCAGTAGAGGAGGAGATT    | Potri.012G127700 |
| MYB199-R    | TTGCCACCCATGTCTAGGATAC    |                  |
| MYB92-F     | TTACACATGGTTATCGGACTG     | Potri.001G118800 |
| MYB92-R     | AAATCTTCTCATCATCGCTCTA    |                  |
| MYB125-F    | AACTACACAGGGTTATCGGATTG   | Potri.003G114100 |
| MYB125-R    | ACGCGTATAATCTAGCGATTGAG   |                  |
| MYB90-F     | TCGGCCCATGAGTTCTAC        | Potri.015G033600 |
| MYB90-R     | AGCCTTGCTCTGATGTTCC       |                  |
| MYB167-F    | AGCAGGAAGCCTTGAAA         | Potri.012G039400 |
| MYB167-R    | TCGTTTGACACACCACCA        |                  |
| MYB161-F    | GATGATGTCGAGGTGGATCAG     | Potri.007G134500 |
| MYB161-R    | TCAAGACCCTACAATCCACTAAC   |                  |
| MYB175-F    | CCCTCGACAATGCTAGAAGAG     | Potri.017G017600 |
| MYB175-R    | GTGAAGGGAACCCGCTAAT       |                  |
| MYB28-F     | CGTTGAAGCATGCCAAATCTC     | Potri.005G096600 |
| MYB28-R     | GTGTCTCGGCAGCATTCTT       |                  |
| MYB192-F    | TTGAAGCTGGCCAGAGCTCA      | Potri.007G067600 |
| MYB192-R    | CTCTCCGCAGCATTCTTCGATAA   |                  |
| MYB26-31-F  | GGTGATGGTTATGGAAGCAATAAA  | Potri.005G063200 |
| MYB26-R     | CCTCCATGATCTCCTTGCTCTT    |                  |

|          |                           |                   |
|----------|---------------------------|-------------------|
| MYB31-R  | GATGATAAAACTGAAGCTTGG     | Potri.007G106100  |
| MYB158-F | TGAAGAAAGGGTGAGGAAAGG     | Potri.005G156600  |
| MYB158-R | GCTTCCATGGCTAACATTGC      |                   |
| MYB189-F | AGGGTTGTTCCAAGTCCATTAG    | Potri.002G073500  |
| MYB189-R | GGTACTCGTCGCTCTCATATTC    |                   |
| MYB10-F  | GAGTGCTTACAGAGGCAAGAG     | Potri.001G099800  |
| MYB10-R  | CAGCTCCCATGTTAGATGAATTTG  |                   |
| MYB128-F | TGGTGCCTATTGAGATGCAATCC   | Potri.003G132000  |
| MYB128-R | CTTCTCCACCAAGTGGTCCTTC    |                   |
| PAL1-F   | ACAAC TTTCTTAGTGGCACTCTGC | Potri.006G126800  |
| PAL1-R   | GCTCCTCAAGTTCCTCCAAATG    |                   |
| PAL2-F   | ACTCCTTGGGCTTGATTTCTGC    | Potri.008G038200  |
| PAL2-R   | ACCAACCAGGTGGTAGACATGAG   |                   |
| 4CL1-1-F | CGAAGCTTTGTTACTAGCCCATCC  | Potri.001G036900  |
| 4CL1-1-R | TCCTGCATCCTCATCTTTCATTCC  |                   |
| COMT2-F  | AGCTGTCGTTAACACCATCGTC    | Potri.012G006400  |
| COMT2-R  | ACATGCTCCACACCGGATAAG     |                   |
| CCR2-F   | TGGAGAGGTGGTGGAAATCCTTG   | Potri.003G181400  |
| CCR2-R   | CTTCTCATCTGAGCACTTGGTAGG  |                   |
| GT43B-F  | GTCGCCCTTCTTCAGTCCAGCA    | Potri.016G086400  |
| GT43B-R  | ACAGTCCTCTGGTGGGATTCCCT   |                   |
| CesA4-F  | AGCATCCAGGACTTGTGGCGTAAT  | Potri.002G257900  |
| CesA4-R  | TGAGGAGGGTGGTCCATTTGAAGA  |                   |
| CesA7A-F | AGCTCTTCTTTGCCTTCTGGGTGA  | Potri.006G181900  |
| CesA7A-R | TGAKTCCACATTGCTTGGTGTGAG  |                   |
| CesA7B-F | GTCCGGATTGATCCATTTGT      | Potri.018G103900  |
| CesA7B-R | CCCTTAGAAGCAGGATGCAC      |                   |
| CesA8B-F | GCTGTTGGCCTCTGTCTTCT      | Potri.004G059600  |
| CesA8B-R | CGCAACCAAGGTGTTATCAA      |                   |
| KOR1-F   | CCATGAGATGCCACAGTTGA      | Poptri.003G151700 |
| KOR1-R   | TCCAAGATGTTCCAAGTCC       |                   |
| KOR2-F   | CCTTGGAGACCATGAGATGC      | Poptri.001G078900 |
| KOR2-R   | CCGTGGAGTCGCATTATCTT      |                   |
| SUSY1-F  | GAACCTTGATCGTCTTGAGAGYCG  | Potri.018G063500  |

|             |                            |                  |
|-------------|----------------------------|------------------|
| SUSY1-R     | GGTTCTGTCTCCMAACYGAAACCA   |                  |
| SUSY2-F     | CAACCTYGATCAYCGTGAGAGCCG   | Potri.006G136700 |
| SUSY2-R     | ACCATTATTCTGGACCCGGAACCC   |                  |
| 18S-F       | AATTGTTGGTCTTCAACGAGGAA    | AF206999         |
| 18S-R       | AAAGGGCAGGGACGTAGTCAA      |                  |
| UBCc-F      | CTGAAGAAGGAGATGACARCMCCA   | Potri.006G205700 |
| UBCc-R      | GCATCCCTTCAACACAGTTTCAMG   |                  |
| ProMYB002-F | ACCTCTCTCATTTCCTCCCTGC     |                  |
| ProMYB002-R | TCCCTGTCACTAGAAAGGTGATCT   | Potri.001G258700 |
| ProHB3-F    | GCCTGCCTCTCATTTATTCTCTAC   |                  |
| ProHB3-R    | CACCTAAAGAAAGAATAAACTTG    | Potri.011G098300 |
| ProHB4-F    | TCTCGATGTCTTTTGATGATTTG    |                  |
| ProHB4-R    | TCAACAAAAACACCTAATAAAAG    | Potri.001G372300 |
| ProEPSP1-F  | TCTTCACGTCCTCTCACCAACCC    |                  |
| ProEPSP1-R  | GGCTTTCACCTCTGTTTCTCTCC    | Potri.002G146400 |
| ProEPSP2-F  | CACGAAGAAAACACAGTGTGGG     |                  |
| ProEPSP2-R  | CTGAATGACAGATGAAAACAAG     | Potri.014G068300 |
| SND1clo-F   | CACCATGCCTGAGGATATGATGAATC |                  |
| SND1-Rstop  | TTATACCGATAAGTGGCATAATGG   | Potri.001G448400 |

857

858

859

860

861

862

863

864

865

|     | PtWND1B  | AtSND1 | PtWND2A | PtWND2B | AtNST1 | AtNST2 | RcNAC | JcNAC013 | MdNAC | GhNAC3 | VvNAC | EgNAC | PtWND6A | PtWND6B | AtVND7 |     |
|-----|----------|--------|---------|---------|--------|--------|-------|----------|-------|--------|-------|-------|---------|---------|--------|-----|
| 866 | PtWND1A  | 94%    | 52%     | 57%     | 56%    | 52%    | 48%   | 86%      | 83%   | 72%    | 74%   | 79%   | 75%     | 40%     | 41%    | 40% |
|     | PtWND1B  |        | 53%     | 57%     | 56%    | 53%    | 49%   | 85%      | 83%   | 72%    | 74%   | 80%   | 75%     | 42%     | 42%    | 40% |
| 867 | AtSND1   |        |         | 56%     | 55%    | 58%    | 55%   | 53%      | 54%   | 54%    | 56%   | 56%   | 53%     | 46%     | 46%    | 45% |
|     | PtWND2A  |        |         | 88%     | 65%    | 58%    | 56%   | 58%      | 55%   | 57%    | 57%   | 57%   | 45%     | 46%     | 45%    | 45% |
|     | PtWND2B  |        |         |         | 64%    | 57%    | 55%   | 57%      | 54%   | 56%    | 57%   | 57%   | 46%     | 47%     | 43%    | 43% |
|     | AtNST1   |        |         |         |        | 72%    | 51%   | 53%      | 51%   | 52%    | 53%   | 53%   | 46%     | 46%     | 44%    | 44% |
|     | AtNST2   |        |         |         |        |        | 47%   | 47%      | 48%   | 49%    | 49%   | 49%   | 45%     | 45%     | 42%    | 42% |
| 868 | RcNAC    |        |         |         |        |        |       | 87%      | 69%   | 72%    | 78%   | 72%   | 41%     | 41%     | 40%    | 40% |
|     | JcNAC013 |        |         |         |        |        |       |          | 71%   | 70%    | 79%   | 73%   | 42%     | 43%     | 39%    | 39% |
| 869 | MdNAC    |        |         |         |        |        |       |          |       | 77%    | 69%   | 65%   | 40%     | 41%     | 41%    | 40% |
|     | GhNAC3   |        |         |         |        |        |       |          |       |        | 70%   | 69%   | 41%     | 41%     | 40%    | 40% |
|     | VvNAC    |        |         |         |        |        |       |          |       |        |       | 71%   | 42%     | 43%     | 42%    | 42% |
| 870 | EgNAC    |        |         |         |        |        |       |          |       |        |       |       | 43%     | 44%     | 42%    | 42% |
|     | PtWND6A  |        |         |         |        |        |       |          |       |        |       |       |         | 92%     | 69%    | 69% |
| 871 | PtWND6B  |        |         |         |        |        |       |          |       |        |       |       |         |         | 67%    | 67% |

872

873 **Supplemental File 2. Percentage protein similarity matrix of selected secondary wall**

874 **associated transcription factors from *Populus* and other species.** Accessions are provided

875 below. AtSND1: At1g32770 (*Arabidopsis thaliana*); AtNST1: At2g46770; AtNST2: At3g61910;

876 AtVND7: AT1G71930; RcNAC: XP\_002518924 (*Ricinus communis*); VvNAC: XP\_002279545

877 (*Vitis vinifera*); JcNAC013: AGL39669 (*Jatropha curcas*); MdNAC: NP\_001280877 (*Malus*

878 *domestica*), GhNAC3: ADN39415 (*Gossypium hirsutum*); EgNAC: KCW72583 (*Eucalyptus*

879 *grandis*). PtWND1A (Potri.011G153300), PtWND1B (Potri.001G448400), PtWND2A

880 (Potri.014G104800), WND2B (Potri.002G178700), PtWND6A (Potri.013G113100) and

881 PtWND6B (Potri.019G083600).

882

883

884

885

886

887

888

889

890

891

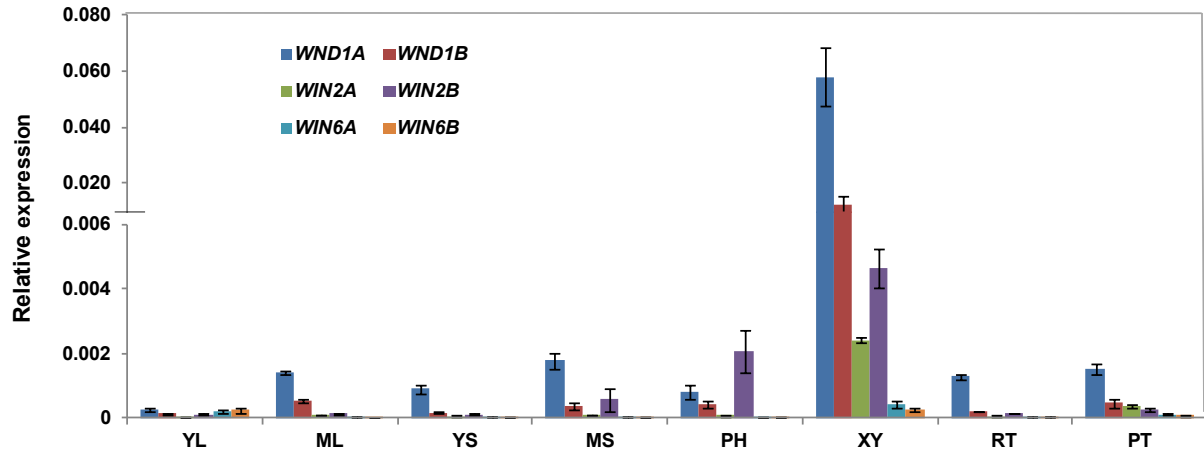

892

893 **Supplemental File 3. Expression of the six NAC genes in different tissues of *Populus*.** YL  
894 (young leaf), ML (mature leaf), YS (young stem), MS (mature stem), PH (phloem), XY (xylem),  
895 RT (root), PT (petiole). Relative expression (arbitrary units) was calculated based on the  
896 expression of target genes relative to house-keeping genes, *Ubiquitin conjugating enzyme E2* and  
897 *18S RNA*. A break in the Y-axis represents discontinuous scale. The data represents mean values  
898 of three biological replicates  $\pm$  SE.

899

900

901

902

903

904

905

906

907

908

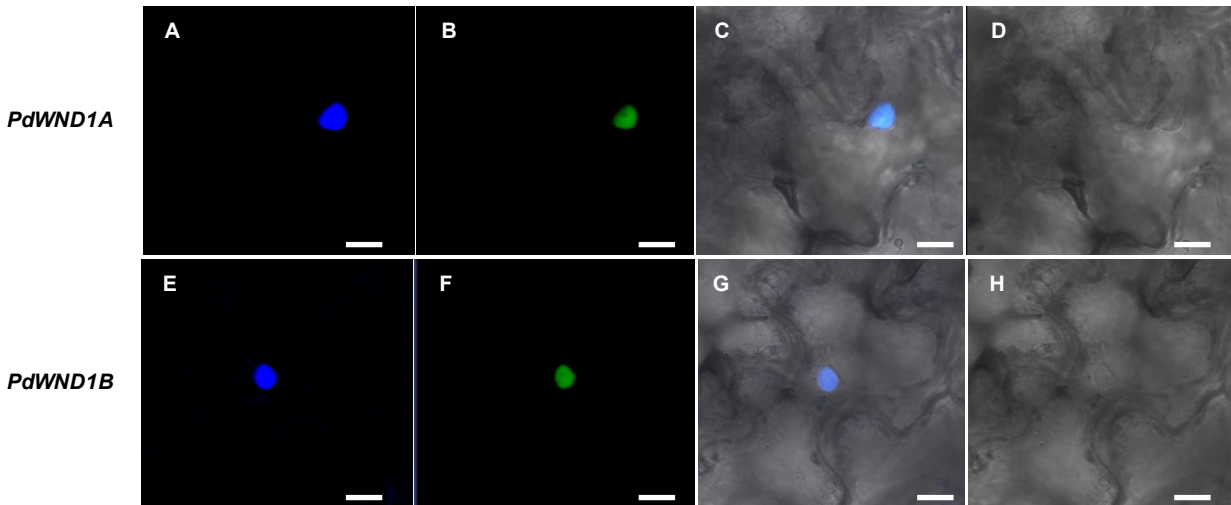

909

910

911 **Supplemental File 4. Localization of the PdWND1A and PdWND1B in tobacco epidermal**  
912 **cells.** Nuclear targeting of GFP: **PdWND1A** (A to D) and **PdWND1B** (E to H) in *Nicotiana*  
913 *benthamiana* mesophyll cells after agro infiltration. Panels A and E are cells stained with DAPI to  
914 show nuclei (blue stain), B and F are GFP localization, C and G are colocalization of DAPI and  
915 GFP, and D and H, no fluorescence control. Scale bar represents 10  $\mu$ M.

916

917

918

919

920

921

922

923

924

925

926

927

928

929



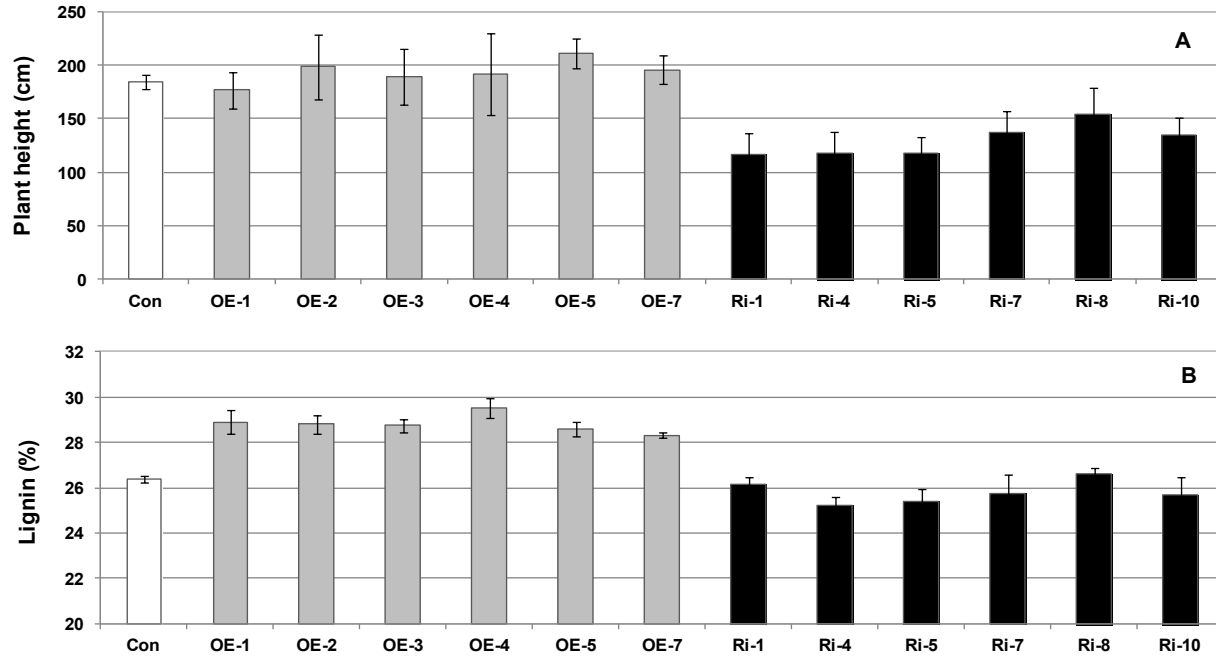

930

931

932 **Supplemental File 5.** Plant height (A) and lignin content (B) in control (Con) and *PdWND1B*

933 over-expression (OE) and RNAi suppression (Ri) lines.

934

935

936

937

938

939

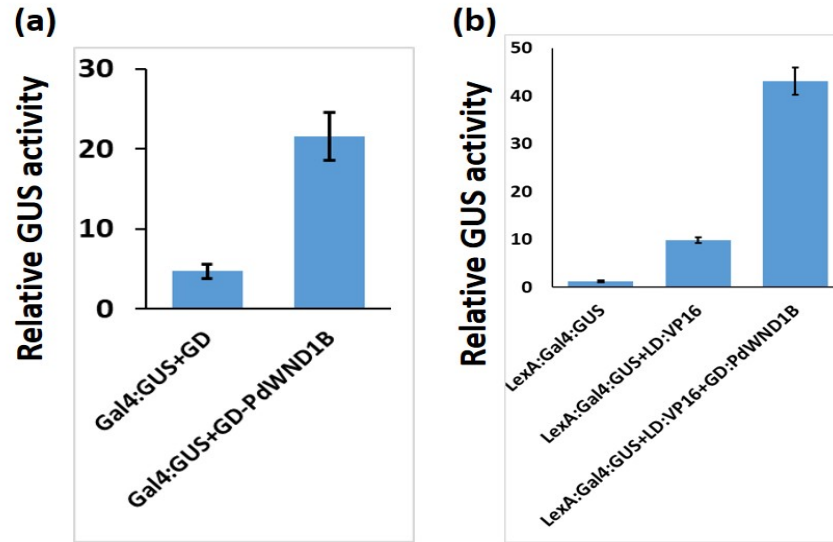

940

941

942 **Supplemental File 6. PdWND1B has transcriptional activator activity.** (a) Protoplasts  
943 transfected with Gal4:GUS reporter together with Gal4 binding domain (GD) fused with  
944 PdWND1B (GD-PdWND1B) shows increased GUS activity as compared to empty GD vector  
945 control. (b) GD-PdWND1B does not repress the expression of GUS reporter when co-transfected  
946 with LexA:Gal4:GUS reporter and LexA binding domain (LD) fused transactivator VP16.

947

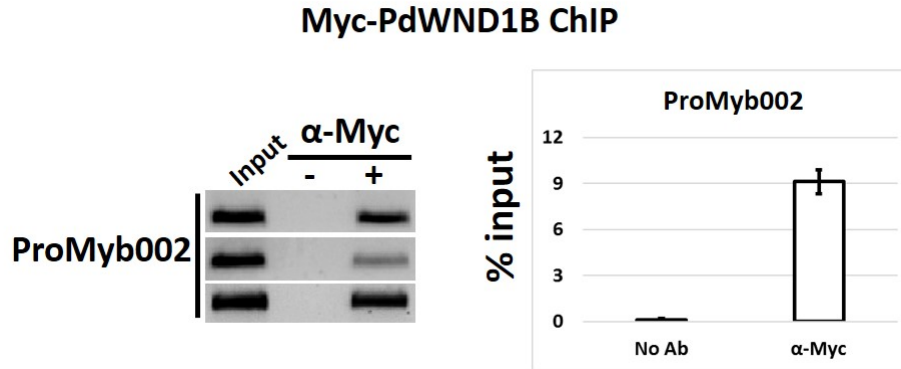

948

949

950 **Supplemental File 7. PdWND1B binds to promoter of *MYB002* secondary cell wall**  
951 **transcription factor gene.** Miro Chromatin immunoprecipitation ( $\mu$ ChIP) from protoplasts  
952 transfected with Myc-fused PdWND1B indicates its binding to the promoter region of Myb002  
953 gene in vivo. Left panel shows gel bands from three replicates including the input lane, no-antibody  
954 negative control and the sample with antibody. ChIP enrichment signal was calculated from  
955 quantitative PCR data as percent of input signal.

956

957

958

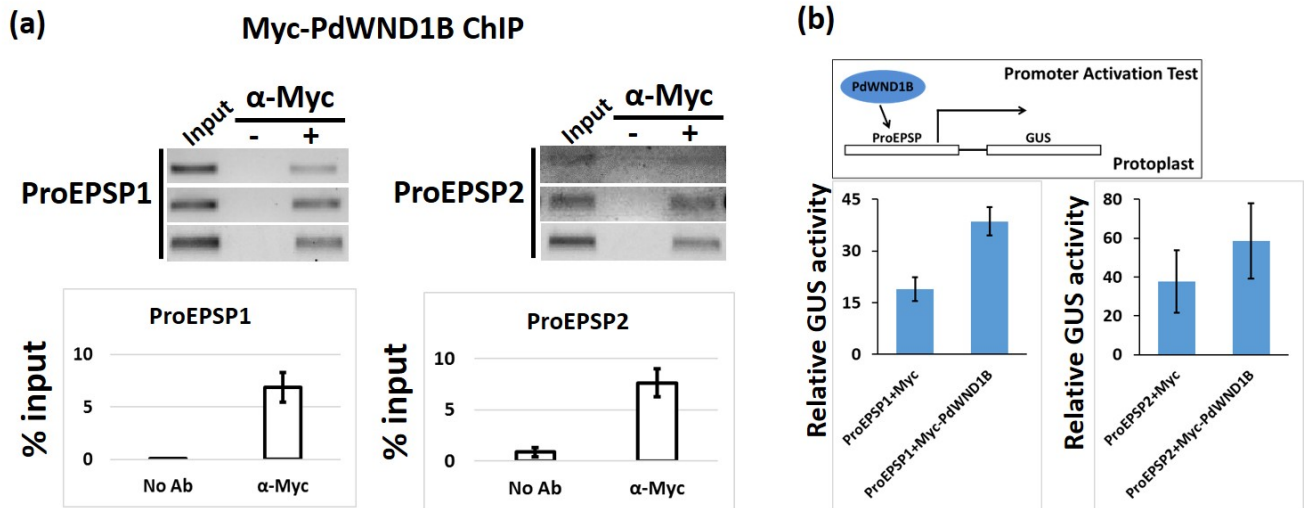

959

960

961 **Supplemental File 8. PdWND1B regulates the expression of *EPSP* genes *in vivo*.** (a)  $\mu$ ChIP  
962 from protoplasts transfected with Myc-fused PdWND1B indicates its binding to the promoter  
963 region of EPSP1 and EPSP2 genes *in vivo*. Top panel shows gel bands from three replicates  
964 including the input lane, no-antibody negative control and the sample with antibody. Bottom panel  
965 shows PCR data for ChIP enrichment signal that was calculated as percent of input. (b) Protoplasts  
966 transfected with a *EPSP* promoter driven GUS reporter together with the Myc-fused PdWND1B  
967 show higher GUS activity as compared to empty vector controls.

968

969

970

971

972

973

974

975

976

977

978

979

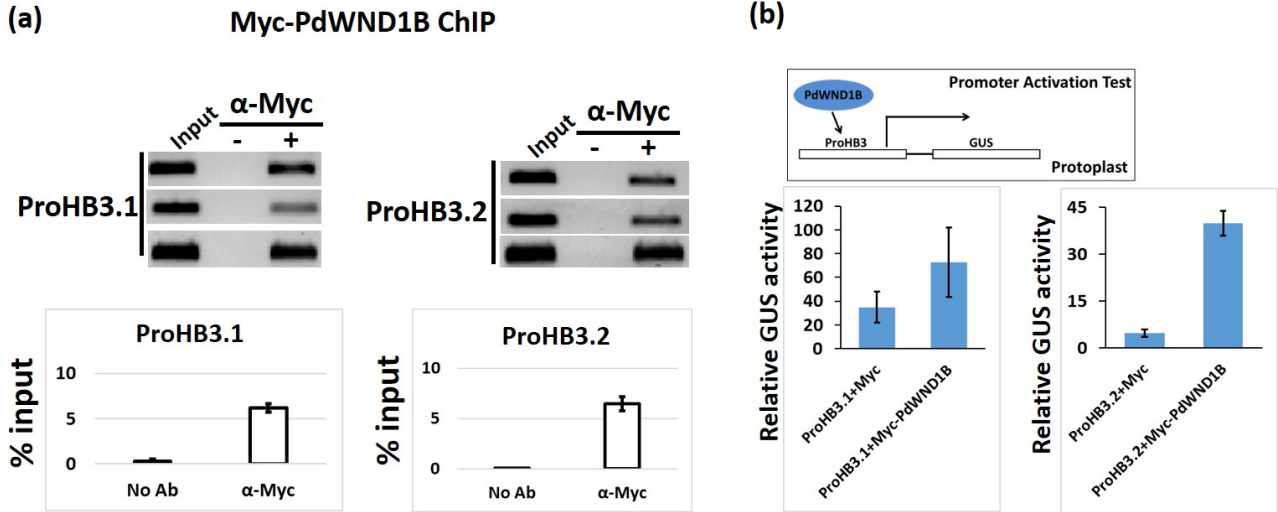

980

981

982 **Supplemental File 9. PdWND1B regulates the expression of *HB3-like* genes *in vivo*.** (a)  $\mu$ ChIP  
983 from protoplasts transfected with Myc-fused PdWND1B indicates its binding to the promoter  
984 region of *PdHB3-like* genes, *PdHB3.1* (*PtHB3*; Potri.011G098300) and *PdHB3.2* (*PtHB4*,  
985 Potri.001G372300), *in vivo*. Top panel shows gel bands from three replicates including the input  
986 lane, no-antibody negative control and the sample with antibody. Bottom panel shows PCR data  
987 for ChIP enrichment signal that was calculated as percent of input. (b) Protoplasts transfected with  
988 an HB3 promoter driven GUS reporter together with the Myc-fused PdWND1B show higher GUS  
989 activity as compared to empty vector controls.
